# Supplementary material for: Genetic tool development in marine protists: Emerging model organisms for experimental cell biology
Source: bioRxiv or medRxiv preprint supplement (doi:10.1101/718239), 2020-04-08
Supplement: Supplementary file [file media-1.pdf]

## SUPPLEMENTARY RESULTS

### Archaeplastids

The prasinophyte *Micromonas pusilla* (CCMP1545) was selected for reverse genetics, as members of the genus *Micromonas* are abundant in marine ecosystems and have larger genomes than *Bathycoccus* and *Ostreococcus*, in addition to having a flagellum<sup>1,2</sup>. Although *M. pusilla* is typically less stable in culture in an axenic state than *M. commoda* (RCC299/NOUM17; deposited at the NCMA after being rendered axenic and genome sequenced as CCMP2709), it was initially selected for manipulation due to its interesting genomic features<sup>3</sup>. The procedures that worked for *Ostreococcus*<sup>4</sup> and *Bathycoccus* (this work) failed with *M. pusilla*. Furthermore, we made multiple attempts to use electroporation and bacterial conjugation (ATCC agrobacterium strain AGL-1) where we also monitored cells to ensure they were in exponential growth at the start of each experiment. We constructed plasmids with a codon-optimized chloramphenicol acetyltransferase (CAT) or eGFP-SV40NLS genes driven by *M. pusilla* RPS9 elements in between Ti-plasmid elements required for *Agrobacterium*-mediated transfer in the pOSCAR plasmid system<sup>5</sup>. We determined *M. pusilla* sensitivity to chloramphenicol by testing a range of concentrations (**Suppl. Table 3**). While it is difficult to say exactly why these efforts failed, we did not observe GFP fluorescence nor did chloramphenicol resistant cells emerge from culture. Because of the persistence of *Agrobacterium* in the culture after transfer, analysis by flow cytometry and recovering axenic cultures was challenging. In all assays where DNA was added directly to cultures, it was in supercoiled form as isolated from *E. coli*. Lonza nucleofection was not attempted with *M. pusilla* due to toxicity to all three Lonza buffers (SF, SG, SE), at least under the conditions tested herein, while buffers SF and SG allowed growth of *M. commoda* (SE was toxic). It should be noted that *M. commoda* and *M. pusilla* have major differences, for example, the latter retains the peptidoglycan pathway (peptidoglycan layer surrounding the plastid), while the former has lost most of this pathway like *Arabidopsis thaliana*<sup>2</sup>. This influences antibiotic usage as many of them work on this pathway. Furthermore, *M. pusilla* has some known RNAi genes while *M. commoda* does not.

*Tetraselmis striata* (KAS-836) is a member of the class Chlorodendrophyceae but the phylogenetic relationship of this group within the green algae remain unclear<sup>6</sup>. Recent chloroplast phylogenomic analyses support the notion that Chlorodendrophyceae is an early lineage of the core Chlorophyta (and no longer part of Prasinophyceae), although its precise placement relative to other chlorophyte lineages could not be resolved<sup>7,8</sup>. Therefore, we selected *T. striata* for genetic transformation, since the development of genetic tools may eventually contribute to understanding its biological features and provide additional evidence for its phylogenetic position. *T. striata* has been successfully transformed using microprojectile bombardment (**Suppl. Fig. 3**). Two selectable markers were tested, consisting of a putative promoter and 5' UTR sequences from the *T. striata* actin gene and either the coding sequences of the *Streptoalloteichus hindustanus* bleomycin gene (conferring resistance to zeocin) or the *Streptomyces hygroscopicus* bar gene (conferring resistance to glufosinate) (**Suppl. Table 3; Suppl. Fig. 3**). The terminator sequence was obtained from the *T. striata* glyceraldehyde-3-phosphate dehydrogenase gene. Linearized plasmids were coated on gold particles and introduced into *T. striata* cells by using the PDS-1000/He Particle Delivery System (BioRad). Transformants were successfully selected on half-strength f/2 (seawater-distilled water in a 1:1 volume ratio) agar plates containing either 150 µg/ml zeocin or 150 µg/ml glufosinate. In contrast, despite repeated attempts to introduce these markers

into the *T. striata* cells by square wave electric pulses using the NEPA21 electroporator (Nepa Gene), we were unable to recover surviving colonies on the selective plates.

*Pyramimonas parkeae* (SCCAP K-0007), class I prasinophyte alga<sup>9</sup>, was targeted by mRNA encoding firefly luciferase and by two circular plasmids. The cells were electroporated by Gene Pulser xCell (BioRad) with 5 µg of *in vitro*-synthesized firefly luciferase mRNA using exponential pulse at 8 different combinations of voltage and capacitance settings (**Suppl. Table 4**). Light emission was measured after 4.5, 5.5 and 22 h, yet no specific luciferase activity could be detected. Before we conducted the genetic transformations, the sensitivity to 5 antibiotics was tested. Puromycin and geneticin were identified to be most effective at a concentration of 30 µg/ml each (**Suppl. Table 3**). Two plasmids containing 5' and 3' UTRs from the *P. parkeae* histone H2 gene were synthesized, with one containing the geneticin resistance gene, while the other plasmid carried the firefly luciferase and puromycin resistance genes. The former gene was flanked by the 5' and 3' UTR's of the native histone H4 gene. Both circular and linearized plasmids were delivered by electroporation using Gene Pulser xCell or Amaxa Nucleofector II (Lonza) (**Suppl. Table 4**). However, no light emission was measured in the cultures post DNA delivery, and no cells were selected even after 4 weeks of growth on selective liquid F2 medium. Subsequently, we have tried to deliver fluorescein- or tetramethylrhodamine-labelled DNA by electroporation or nucleofection as described above, with various settings (**Suppl. Table 4**), as well as by biolistics (PDS-1000/He [BioRad]; 0.6 µm particles; 1250 psi) to test the DNA delivery efficiency. Nucleofection resulted in fluorescent signal from inside the cells suggesting the DNA delivery was successful (**Suppl. Fig. 4**), although expression was not achieved.

### **Haptophytes (*incertae sedis*)**

*Emiliania huxleyi* (see Transformation of natural protist communities)

### **Rhizarians**

*Bigelowiella natans* (CCMP 2755) is a widespread chlorarachniophyte<sup>10</sup>, which we have attempted to transform independently with 2 circular plasmids. One plasmid contained the firefly luciferase gene, while the other carried both the luciferase and geneticin resistance cassette. Approximately 300 nt 3' and 5' UTRs of the *B. natans*-derived histone H4 were used as endogenous promoters and terminators for driving the geneticin resistance gene. As for the firefly luciferase gene, the native regulatory sequences were derived from the up- and downstream flanking regions of an endogenous pyruvate kinase gene. Although 3 methods of delivery (electroporation of circular plasmid, lipofection, and biolistics - **Suppl. Table 4**) were tested, no transformants were obtained and no light emission was measured in the culture post-DNA delivery. Finally, we have also attempted delivery of tetramethylrhodamine-labelled DNA using electroporation and biolistics (**Suppl. Table 4**), yet also with an unsuccessful outcome.

### **Stramenopiles**

Although genetic transformation of diatoms using biolistics has been ongoing for decades<sup>11,12</sup>, it has only recently accelerated, partially fuelled by the availability of more genome sequences and numerous transcriptomes<sup>13</sup>, as well as by the development of novel genome editing methods. Indeed, new model diatoms are being developed to address questions that cannot be investigated with their more established representatives *Thalassiosira pseudonana* and *Phaeodactylum tricorutum*<sup>14</sup>. Different diatom species have been transformed using a variety of DNA delivery methods including electroporation,

biolistics, and conjugation. Targeted gene expression and genome editing have also been achieved using overexpression<sup>15</sup>, RNAi<sup>16</sup>, meganucleases, TALENs<sup>17</sup> and CRISPR/Cas9<sup>18</sup>. Building on these successes and extensive resources, we here extend this work to other ecologically and economically important diatom species. Our primary goal was to increase the repertoire of tools available for their genetic manipulation, as well as to describe what was tried with the other species.

*Seminavis robusta* (D6 and VM3-4), a benthic pennate diatom with a well-defined life cycle, is accessible to genetic analysis due to the presence of 2 defined mating types<sup>19</sup>. We maintained strains D6 and VM3-4 in autoclaved filtered artificial sea water at 12 h light-dark cycle at 18 °C in F/2 medium supplemented with Guillard's F/2 nutrients, and with 250 µg/ml penicillin, 250 µg/ml ampicillin, 50 µg/ml streptomycin sulfate, and 25 µg/ml gentamicin for regular maintenance. Antibiotic sensitivities were established by following for 3 days the division of small number of cells deposited in arrays of 40 µl drops on Petri dishes, which was both faster and more reliable than screening in bulk cultures. In such liquid cultures, we found that 250 µg/ml of glyphosate or 10 µg/ml of puromycin were sufficient to arrest growth, thus qualifying as selectable marker for transformation (**Suppl. Table 3**). To create 3 transformation constructs (pBS\_Act\_Agro4GlyphR, pBS\_Act\_PurR and pBS\_ActEF-AgroCP4GlyphR), the puromycin N-acetyltransferase and agrobacterium CP4 glyphosate resistance genes were codon optimized (**Suppl. Table 5**) and cloned into different plasmids. To drive their expression, each antibiotic resistant marker gene was 5' flanked with 1.2 kb promoter from a highly expressed actin 1, while the 3' flanking region was represented by either 1.64 kb 3' region derived again from actin 1, or 1.0 kb 3' region derived from the elongation factor 1 of *S. robusta*. However, transformation failed with either biolistic bombardment PDS1000 (BioRad) or electroporation (BTX ECM 2001 and NEPA21) (**Suppl. Table 4**). Following biolistic bombardment, we found that the recovered cultures, which were of only one mating type, contained many apparent exconjugants. This implied that the cultures had undergone self-mating<sup>20</sup>. This observation may be useful for future genetic studies, as it might allow inducing the formation of homozygotes from a clonal population.

*Heterosigma akashiwo* (CCMP2393) is a harmful algal species from the raphidophyte group, causing fish mortality. Although no specific toxin has been isolated, reports indicate that some raphidophytes produce a suite of compounds that contribute to their toxicity, including reactive oxygen species<sup>21</sup>, polyunsaturated fatty acids<sup>22</sup> and brevetoxin-like compounds<sup>23</sup>. Research on *H. akashiwo* suggests that toxicity is strain-specific and linked to genetic markers<sup>24</sup>. *H. akashiwo* is also a candidate for biodiesel production<sup>25</sup> and its non-toxic strain is being developed for biofuel production coupled to bioremediation of industrial emissions<sup>26</sup>. While the nuclear genome has not been fully sequenced yet, transcriptomes and the plastid genome are available<sup>27</sup>.

Antibiotic sensitivities of *H. akashiwo* are listed in **Suppl. Table 3**. Plasmids were constructed from *Chlamydomonas reinhardtii* Chlamy\_3 and 4, and the diatom pPhat\_T1 plasmids<sup>28</sup>. pChlamy\_3 was modified with cLuc or cGFP reporter genes<sup>29</sup>, while pChlamy\_4 and pPhat\_T1 vectors were modified with pAES-Luc<sup>30</sup>. All reporter genes were codon optimized for *C. reinhardtii*. Three transformation methods were compared: a glass bead beating protocol, electroporation and *Agrobacterium*-mediated transformation (**Suppl. Table 4**). Of these, an optimized bead-beating protocol successfully and repeatedly produced cultures transformed with a plasmid conferring hygromycin resistance. For this protocol, cells were harvested, washed and resuspended in MAX Efficiency Transformation Reagent for Algae or with 384 mM sorbitol. Cells were mixed with 1-10 µg of linearized plasmid and

glass beads (425-600  $\mu\text{m}$ ), vortexed at high speed for 10 s and transferred to a fresh medium with cefotaxime to control bacterial growth. Transformation and expression were verified up to 9 months after the experiment by PCR and RT-PCR amplifications of antibiotic-resistance genes, respectively, but we were not successful in visualizing the fluorescent reporter by microscopy. An optimized electroporation protocol achieved lower efficiency than the bead beating protocol. Cells resuspended as described above with at least 1  $\mu\text{g}$  of linearized plasmid were electroporated using Gene Pulser xCell with a 10-15 ms pulse at 50/75 V, 25  $\mu\text{F}$  and  $\infty\Omega$ . Finally, when transformation with *Agrobacterium* carrying cGFP was attempted, *H. akashiwo* survived the co-cultivation step but there was little or no viability apparent after several days of hygromycin selection. A major constraint of all methods was that *H. akashiwo* could not be cultured on solid media and hence single-cell transformants were not selected for further analysis. Therefore, all work was done with cells suspended in culture medium. A comparison of methods revealed that PEG-mediated bead beating produced the best results.

Fluorescein isothiocyanate conjugated to dextran, a fluorescent DNA analog, has been successfully introduced into *Caecitellus* sp. using a high voltage exponential decay pulse (1000 V, 10  $\mu\text{F}$ ,  $\infty\Omega$ ) from a GenePulser xCell (cuvette width 0.2 cm). Cell viability was confirmed by observing motility and fluorescence 24 h after electroporation. Lower voltage pulses did not result in DNA delivery.

For *P. tricornutum* (CCAP1055/1), we adapted the CRISPR/Cas9 system for multiplexed gene mutagenesis. Bacterial conjugation was used to deliver an episome that contained a Cas9 cassette and 2 single-guide RNA (sgRNA) expression cassettes designed to mutate glutamine synthetase II and a nuclear-encoded chloroplastic glutamate synthase. The GoldenGate assembly was used to clone two expression cassettes carrying sgRNAs into a *P. tricornutum* episome that contained a Cas9-2A-ShBle expression cassette and the centromeric region CenArsHis (**Suppl. Fig. 6A**). A successfully assembled episomal plasmid with 2 sgRNA and one LacZ insert produced blue *E. coli* colonies (**Suppl. Fig. 6B**). After their addition to a *P. tricornutum* culture, plates were incubated in a growth chamber under standard growth conditions for 2 days and transformed *P. tricornutum* colonies began to appear after 14 days. Only colonies maintaining Cas9-2A-ShBle sequence on the delivered episome were able to grow on selection plates because Cas9 and the antibiotic-resistant gene (ShBle) were transcriptionally fused by the 2A peptide<sup>31</sup> (**Suppl. Fig. 6C**). Sequencing of PCR products from target genes confirmed the deletions (**Suppl. Fig. 6D**).

### Alveolates

For introduction see Results. *Euplotes crassus* (txid5936) and *Euplotes focardii* (txid36767) are marine ciliates carrying a micronuclear genome that represents the germ line, and a macronuclear genome containing single-gene nanochromosomes amplified to thousands of copies for their somatic life<sup>32</sup>. Both ciliates are suitable for studying DNA rearrangements and transposition mechanisms, which have been observed in macronuclei after completion of the sexual cycle<sup>33,34</sup>. *E. crassus* and *E. focardii* are resistant to antibiotics usually used for genetic transformations such as ampicillin (100  $\mu\text{g}/\text{ml}$ ). However, geneticin (200  $\mu\text{g}/\text{ml}$ ), paromomycin (200  $\mu\text{g}/\text{ml}$ ) and puromycin (40  $\mu\text{g}/\text{ml}$ ) are effective (**Suppl. Table 3**) when cells were grown in a modified medium (10% artificial seawater and 90% 0.3 M glucose). Here, we describe conditions for growing both *Euplotes* species in the presence of bacteria, which are being used as vectors for transmitting RNAi to knockdown genes in ciliates. Plasmids and artificial nanochromosomes ending with telomeres that contain either eGFP and/or geneticin as selectable marker, both optimized according to the *Euplotes* codon usage,

have been generated. They resemble the *Euplotes* nanochromosome structure with the flanking non-coding regions belonging to the constitutive highly expressed *Euplotes* genes. Telomeres have been added via PCR using primers containing a specific sequence and ending with C<sub>4</sub>A<sub>4</sub> repeats. The 940 nt eGFP artificial nanochromosomes are composed of *E. crassus* 5' UTR from a highly expressed gene as promoter, eGFP coding sequence, *E. crassus* 3' UTR from a highly expressed gene, and telomeres on both ends. The 3.2 kb artificial nanochromosomes containing eGFP and resistance to geneticin are composed of  $\beta$ -tubulin 5' UTR,  $\beta$ -tubulin coding sequence, a spacer, eGFP coding sequence,  $\beta$ -tubulin 3' UTR,  $\alpha$ -tubulin 3' UTR, geneticin resistance gene,  $\alpha$ -tubulin 5' UTR, and telomeres on both ends. The DNA delivery protocols (**Suppl. Table 5**) were successful, since we could confirm the presence of Cy3-labelled plasmids inside the cells following electroporation, lipofectamine transfection, and microinjection (**Suppl. Table 4**). However, there is no evidence for either incorporation of the plasmids into the nuclear genome or for the expression of the introduced marker genes (eGFP and/or resistance to geneticin).

*Chromera velia* (CCMP2878) is a marine photosynthetic alveolate associated with corals<sup>35</sup>. We were not able to identify antibiotics suitable for its selection (**Suppl. Table 3**), although a range of antibiotics at different concentrations was tested. Nevertheless, we developed 2 plasmids for the transformation of *C. velia*. The first one contained the firefly luciferase gene, while the other plasmid carried both luciferase and the puromycin resistance genes. The *C. velia*-derived ~300 nt 5' UTR of the enolase gene and equally long 3' UTR of its H4 histone gene were used as regulatory sequences of the puromycin resistance gene. In the case of the firefly luciferase gene, the native regulatory sequences were derived from the 5' and 3' UTRs of histone H1 and pyruvate kinase, respectively (**Suppl. Table 5**). Electroporation with 5 different settings was tested to deliver circular and linear plasmids into the cells (**Suppl. Table 4**), yet there was no evidence of successful transformation, as no luciferase activity was detected by Sirius luminometer after 5 or 24 h. The same negative result was obtained following the delivery of tetramethylrhodamine-labelled DNA using electroporation and biolistics. Finally, 1  $\mu$ g of *in vitro* synthesized firefly luciferase mRNA was used for electroporation with 4 different settings (**Suppl. Table 4**), and light emission was measured after 24 h, yet again, no specific luciferase activity has been detected.

*Hematodinium sp.* belongs to the order Syndiniales and infects the hemolymph of many marine decapod crustaceans. The genus is considered an emerging pathogen for both natural populations and aquacultured crustaceans, with an expanding host range<sup>36,37</sup>. The parasite has multiple stages in the hemolymph<sup>38</sup> and can be continuously maintained in the laboratory<sup>39</sup>. *Hematodinium* cells were transformed using electroporation (Amaxa Nucleofector D-023; BioRad X-100), as well as *via* the glass beads abrasion protocol, the latter having a much higher survival rate (**Suppl. Table 4**). Cells were transformed with 150 kDa FITC-dextran and HEM or Cas9/sgRNA with GFP sequence as DNA donor. We have also tested the use of a synthetic viral RNA derived from a virus known to infect the dinoflagellate *Heterocapsa circularisquama*<sup>40</sup>. Originally, the RNA molecule had 2 ORFs: one that codes for a putative polyprotein bearing a protease and an RNA-dependent RNA polymerase, while the other codes for a capsid protein<sup>41</sup>. We have exchanged the second ORF with an eGFP reporter and *in vitro* transcribed RNA was used to transform *Hematodinium* (**Suppl. Table 5**). However, based on microscopy and PCR verification no clear positive result was observed. Still, *Hematodinium* appears to be a promising organism to transform since in comparison to many dinoflagellates, its cell does not have any theca or cell wall.

*Fugacium (Symbiodinium) kawagutii* (CCMP 2468) and *Alexandrium catenella* (CCMP BF-

5) are both dinoflagellates. *F. kawagutii*, (formerly known as *Symbiodinium*) is a symbiont originally isolated from the scleractinian coral *Montipora capitata* and has a draft genome available<sup>42</sup>. *A. catenella* is a free-living dinoflagellate and produces potent neurotoxins resulting in paralytic shellfish poisoning<sup>43</sup>. Both species were tested for antibiotic sensitivities (**Suppl. Table 3**). Subsequently, an *Agrobacterium*-mediated transformation method<sup>44</sup> was applied on *F. kawagutii* using the published plasmids, and Basta as the selecting agent. However, this method proved to be difficult to reproduce. Thus, for both species, we developed an electroporation protocol using MicroPulser (BioRad) (**Suppl. Table 4**). Centrifugation protocols that would result in concentrated cells with minimal damage were found to be species-dependent (*F. kawagutii* 800 g for 5 min and *A. catenella* 800 g for 1 min). Through extensive testing, a suitable transfection solution (10% glycerol in Milli-Q water) that resulted in minimal mortality for both dinoflagellates was identified. Several pulse conditions were tested for each species: Sc2 and ShS performed best for *F. kawagutii* and *A. catenella*, respectively (**Suppl. Table 4**). Plasmids described elsewhere<sup>44</sup> were used in addition to our DinoIII-gfp/DinoIII-pat/DinoIII-bsr vectors<sup>45</sup>. Each plasmid contained either a eGFP reporter, a selection marker, or both. They were introduced into cells as circular or linearized plasmids, and their presence was tested by PCR. The results were inconclusive, species-dependent, with generally very low efficiency. Hence, we tested other methods such as biolistics on *F. kawagutii* and *A. catenella* and electroporation with the Nucleofector (Lonza) on *A. catenella* (**Suppl. Table 4**). For biolistics, a method developed previously<sup>17</sup> was applied using various rupture discs and microcarriers. Due to the difficulty of growing dinoflagellates on agar, 3 µm Millipore filters were used to collect cells and were placed on agarose plates during the biolistic procedure and were then transferred to liquid media for recovery and selection. While *A. catenella* and *F. kawagutii* performed best with 900 PSI and 1550 PSI rupture discs, respectively, the results were inconclusive.

The pyrimidine analog 5-fluoroorotic acid (5FOA) has been shown to successfully suppress the growth of *Breviolum* (*Symbiodinium*) sp. (**Suppl. Table 3**). A 5FOA-resistant uracil-requiring mutant strain was isolated, which possesses a splice variant mutation in the URA3 gene<sup>46</sup>. We therefore tried to develop a method to complement the phenotypes (i.e., uracil requirement and 5FOA resistance) of this URA3 mutant with the wild type homolog. The full-length URA3 gene was amplified by PCR and cloned into pBlueScript. So far multiple attempts to transform the mutant with this plasmid, either linearized or circular, using electroporator NEPA21 failed (**Suppl. Table 4**). However, we have successfully introduced fluorescein into *Breviolum* sp., using the same method as the DNA-based transformation (**Suppl. Table 5**), suggesting that homologous recombination alone might not be effective enough to replace the mutated version with the wild type sequence.

### Discobids

*Eutreptiella gymnastica* (SCCAP K-0333) is a marine green euglenophyte distantly related to the recently sequenced model euglenid, *Euglena gracilis*<sup>47</sup>. All attempts to transform *E. gymnastica* with either the firefly luciferase mRNA or 2 circular plasmids failed. Four methods for DNA delivery were tested, and their efficiency was checked by labelled DNA (**Suppl. Fig. 4; Suppl. Table 4**). Following electroporation with 5 µg of *in vitro* synthesized mRNA for firefly luciferase (10 different settings tested) (**Suppl. Table 4**), light emission was measured after 3.5, 5.5, and 22 h, yet no specific luciferase activity has been detected.

The antibiotic selection by 10 µg/ml of puromycin was used for transformations based on plasmids (**Suppl. Table 3**). One plasmid contained the firefly luciferase gene inserted between *E. gymnastica*-derived 300 nt 5' and 3' UTRs of the histone 2A gene. The other plasmid contained this region complemented with the puromycin resistance gene flanked

upstream by 5' UTR region of histone-lysine N-methyltransferase and downstream by 3' UTR region of chloroplast light-harvesting complex II gene from *E. gymnastica*. Four methods for delivery of these 2 plasmids were performed: electroporation, lipofection and particle bombardment-mediated delivery of circular or linearized plasmids (**Suppl. Tables 4 and 5**). However, we were unable to identify any transformants under selective conditions and no light emission was measured in cultures post-DNA delivery. Since none of the transformation methods was successful, we have proceeded to the delivery of fluorescein- or tetramethylrhodamine-labelled DNA using all 4 delivery methods listed above. In case of electroporation and lipofection, a seemingly intracellular fluorescent signal could be detected suggesting the DNA delivery succeeded, although expression was not achieved (**Suppl. Fig. 4**).

### **Opisthokonts**

For the ichthyosporean *Pirum gemmata* we performed electroporation by Neon (Invitrogen) and calcium phosphate transfection approaches using heterologous promoters from another ichthyosporean *Sphaeroforma artica*, yet with no success. Although transfection of *S. artica* did not result in successful DNA delivery (**Suppl. Table 4**), we identified 4 antibiotics (benomyl, carboxine, phleomycin and puromycin), which might be used for future work with *S. artica* (**Suppl. Table 3**).

### **Transformation of natural protist communities**

Generally, genetic transformation has been achieved in a relatively small number of marine protists, with stable transformation reliably achieved in even fewer of them<sup>48</sup>. Model organisms are typically selected based on well-known criteria, such as relative ease of isolation, cultivation in the laboratory and small genome size. However, these attributes may not correlate with the capacity for uptake and expression of exogenous DNA which, nevertheless, is key for genetic tractability. Thus, using a culture-independent, we explored the ability of natural marine planktonic pico- and nano-eukaryotic communities to incorporate and express exogenous DNA.

We used a strategy based on electroporation and flow cytometry, to identify cells from natural communities, which had incorporated and expressed DNA (using FITC-dextran) tagged to the gene encoding the blue-fluorescent protein (mTagBFP2). We constructed plasmids expressing mTagBFP2 under the control of the cauliflower mosaic virus 35S (35S) and the cytomegalovirus (CMV) promoters reported to function in a broad range of eukaryotes including phytoplankton<sup>49</sup>, as well as a VCP1 promoter previously described from a pico-stramenopile. Plasmids with mTagBFP2 driven by the 35S and CMV promoters were first validated in human embryonic kidney cells and yeast, allowing their functionality to be confirmed prior to testing micro-algae cultures and natural communities. The electroporation protocol was developed using both cultured *Nannochloropsis oceanica*, *Isochrysis galbana*, and *Emiliania huxleyi*, as well as natural communities collected and concentrated by tangential flow filtration (Vivaflow). Electroporation efficiency was monitored with 10 mg/ml of fluorescein-conjugated 2000 kDa dextran (for *I. galbana* the concentration of dextran was lowered to 0.5 mg/ml), and cells were analyzed using an InFlux flow cytometer equipped with a 488 nm principal laser (for determining forward and side scatter as well as green fluorescence from fluorescein at  $530 \pm 20$  nm and red fluorescence from chlorophyll at  $692 \pm 20$  nm), a 405 nm laser (for blue fluorescence at  $460 \pm 25$  nm), and a 640 nm laser (for red fluorescence from chlorophyll at  $692 \pm 20$  nm). Cells were washed over polycarbonate filters with different concentrations of sorbitol, in which they were resuspended. Highest recovery of both natural and cultured phytoplankton was obtained with 800 mM sorbitol.

Electroporation was performed with a Gene Pulser II (BioRad) in 0.2 cm cuvettes. Voltages of between 4 and 10 kV/cm with time constants of 8 ms and 20 ms, respectively, were tested. For *N. oceanica*, 5 and 9 kV/cm with time constant of 20 ms was used. For *I. galbana*, 5 kV/cm with a 20 ms time constant was chosen after preliminary tests. For natural communities, as it is not possible to optimize for all potential members, 5 kV/cm with an 8 ms time constant and 10 kV/cm with a 20 ms time constant were usually used in parallel and on a set of sub-samples. Electroporated samples were allowed to recover in moderate (<50  $\mu\text{mol phot/m/s}$ ) light at about 15° C and followed for up to 72 h.

The protocol was first tested with plasmids and cultures of *N. oceanica*, *I. galbana*, and *E. huxleyi*, always comparing cells electroporated with plasmids to those electroporated with the same protocol but without plasmids (negative control). In both *N. oceanica* and *I. galbana*, blue fluorescent cells appeared within several hours. However, the percentage of cells successfully transformed varied greatly, ranging from a few percent to >70%, and, similarly, the percentage of blue fluorescent cells varied from ~1% to over 20%. In *N. oceanica*, the CMV promoter was effective at driving blue fluorescence, with >20% transformants when a linearized plasmid was used (**Fig. 4; Table 1; Suppl. Table 5**), but only <2% when the plasmid was circular (**Table 1**). The 35S promoter resulted in inconsistent results with both linearized and circular plasmids, and in two trials there was no change in blue fluorescence with the VCP1 promoter. In *I. galbana*, the 35S promoter resulted in blue fluorescence peaking in up to 20% of cells at 4 h and declining thereafter. In calcified *E. huxleyi* cultures, electroporation both with and without plasmid resulted in inconsistent survival, and fluorescence and light scatter signatures became much dispersed, making interpretation impossible.

In 3 out of 6 trials with natural communities, blue-fluorescent pico-eukaryotes appeared in samples electroporated with plasmids encoding mTagBFP2. In one of these natural communities, an important portion of a particular pico-phytoeukaryote (grouped based on optical properties) exhibited blue fluorescence. Indeed, 58 to 68% cells fluoresced when electroporated at 5 kV/cm after 2 h with a plasmid containing the CMV promoter. Curiously, a portion of these cells (up to 18% at 12 h after electroporation) showed blue fluorescence when exposed to plasmid DNA even in the absence of electroporation, although the time course was markedly slower (**Suppl. Figure 7**). Unfortunately, when sorting for culturing was prepared at the 24 h time point, the signal of blue fluorescence was so diminished that we could only sort pico-phytoplankton with similar light scattering and pigment autofluorescence characteristic for live cultures. However, based on two replications, our initial results were not reproducible.

Taken together, transforming natural marine planktonic protist communities is challenging because of the following issues. First, the natural abundance of protist cells is usually very low (< 1000 per ml), and therefore they should be concentrated by i.e. tangential flow filtration. Second, the salts from seawater need to be removed for electroporation, resuspending the cells in sorbitol. Finally, it is not possible to optimize the electroporation protocol for a natural community, as even when the same location is sampled repeatedly, the community will likely be different due to the dynamics of the marine system. For the latter reason, in most trials we used 2 different electroporation protocols in parallel on distinct sub-samples. The variable and low percentage of apparently transformed cells presents a challenge for cell sorting, for transfer into media, for determining identity-independent culturing, and for confirming the expression of the eGFP gene. A recently published method based on single cell sorting and subsequent culturing may help to address these issues<sup>51</sup>.



Although amplification of barcoding genes (e.g. 18S rRNA) from sorted populations is becoming more routine, we were unable to obtain amplicons from populations of pico-phytoeukaryotes that exhibited a high percentage of blue fluorescent cells, suggesting an alternative protocol is required for transformed populations.

### **Open Material Transfer Agreement (OpenMTA)**

For sharing biological material (e.g. cells and DNA), the available Material Transfer Agreement (MTA)<sup>52</sup> is not well suited for the needs of collaborative projects aiming at the development of community-sourced toolkits. The shortcomings of traditional MTAs have recently been addressed<sup>52</sup>. Although MTA barriers could be bypassed by *de novo* synthesis of DNA, this would be very impractical and costly. Instead, we highly recommend the adoption of the OpenMTA; <https://www.openplant.org/openmta/> for future community-wide efforts. An OpenMTA enables more expedited processing times, decreased administrative transaction costs, broader sharing, use and redistribution of biological materials, while maintaining the rights of creators and promoting safe practices and responsible research. Perhaps most importantly, OpenMTA allows tracking the provenance and impact of projects<sup>53</sup>. OpenMTA is more compatible with public and philanthropic funding policies as well as with open science practices.

### **Supplementary References**

1. Simmons, M. P. et al. Intron invasions trace algal speciation and reveal nearly identical Arctic and Antarctic *Micromonas* populations. *Mol. Biol. Evol.* **32**, 2219–2235 (2015).
2. Van Baren, M. J. et al. Evidence-based green algal genomics reveals marine diversity and ancestral characteristics of land plants. *BMC Genomics* **17**, (2016).
3. Worden, A.Z. et al. Green evolution and dynamic adaptations revealed by genomes of the marine picoeukaryotes *Micromonas*. *Science* **324**, 268–272 (2009).
4. Van Ooijen, G., Knox, K., Kis, K., Bouget, F-Y. & Millar, A. J. Genomic transformation of the picoeukaryote *Ostreococcus tauri*. *J. Vis. Exp.* **65**, e4074 (2012).
5. Paz Z. et al. One step construction of *Agrobacterium*-recombination-ready-plasmids (OSCAR), an efficient and robust tool for ATMT based gene deletion construction in fungi. *Fungal Genet. Biol.* **48**, 677–684 (2011).
6. Duanmu, D. et al. Marine algae and land plants share conserved phytochrome signaling systems. *Proc. Natl. Acad. Sci. USA* **111**, 15827–15832 (2014).
7. Turmel, M., de Cambiaire, J. C., Otis C. & Lemieux, C. Distinctive architecture of the chloroplast genome in the Chlorodendrophycean green algae *Scherffelia dubia* and *Tetraselmis* sp. CCMP 881. *PLoS One* **11**, e0148934 (2016).
8. Fang, L. et al. Improving phylogenetic inference of core Chlorophyta using chloroplast sequences with strong phylogenetic signals and heterogeneous models. *Mol. Phylogenet. Evol.* **127**, 248–255 (2018).
9. Leliaert, F. et al. Chloroplast phylogenetic analyses reveal the deepest-branching lineage of the Chlorophyta, Palmophyllophyceae class. nov. *Sci. Rep.* **6**, 25367 (2016).
10. Rogers, M. B., Gilson, P. R., Su, V., McFadden, G. I. & Keeling, P. J. The complete chloroplast genome of the chlorarachniophyte *Bigelowiella natans*: Evidence for independent origins of chlorarachniophyte and euglenid secondary endosymbionts. *Mol. Biol. Evol.* **24**, 54–62 (2006).
11. Dunahay, T. G., Jarvis, E. E. & Roessler, P. G. Genetic transformation of the diatoms *Cyclotella cryptica* and *Navicula saprophila*. *J. Phycol.* **3**, 1004–1012 (1995).

12. Poulsen, N. & Kroger, N. A new molecular tool for transgenic diatoms. Control of mRNA and protein biosynthesis by an inducible promoter-terminator cassette. *FEBS J.* **272**, 7413-3423 (2005).
13. Mock, T. et al. Evolutionary genomics of the cold-adapted diatom *Fragilariopsis cylindrus*. *Nature* **541**, 536–540 (2017).
14. Russo, M. T., Cigliano, R. A., Sanseverino, W. & Ferrante, M. I. Assessment of genomic changes in a CRISPR/Cas9 *Phaeodactylum tricornutum* mutant through whole genome resequencing. *PeerJ.* **6**, e5507 (2018)
15. Vardi, A., Bidle, K. D., Kwityn, C., Hirsh, D. J. & Thompson, S. M. A diatom gene regulating nitric-oxide signaling and susceptibility to diatom-derived aldehydes. *Curr. Biol.* **18**, 895-899 (2008).
16. De Riso, V., Raniello, R., Maumus, F., Rogato, A. & Bowler, C. Gene silencing in the marine diatom *Phaeodactylum tricornutum*. *Nucleic Acids Res.* **37**, e96 (2009).
17. Daboussi, F. et al. Genome engineering empowers the diatom *Phaeodactylum tricornutum* for biotechnology. *Nat. Commun.* **5**, 3831 (2014).
18. Hopes, A., Nekrasov, V., Kamoun, S. & Mock, T. Editing of the urease gene by CRISPR-Cas in the diatom *Thalassiosira pseudonana*. *Plant Methods* **12**, 49 (2016)
19. Moeys, S. et al. A sex-inducing pheromone triggers cell cycle arrest and mate attraction in the diatom *Seminavis robusta*. *Sci. Rep.* **6**, 19252 (2016).
20. Chepurinov, V. A., Chaerle, P., Vanhoutte, K. & Mann, D. G. How to breed diatoms: examination of two species with contrasting reproductive biology. In: R. Gordon and J. Seckbach (Eds.), *The Science of Algal Fuels*, Springer **323-340**, (2012).
21. Marshall, J. A., de Salas, M., Oda, T. & Hallegraeff, G. Superoxide production by marine microalgae. *Marine Biol.* **147**, 533-540 (2005).
22. de Boer, M. K. et al. Haemolytic activity within the species *Fibrocapsa japonica* (Raphidophyceae). *Harmful Algae* **8**, 699-705 (2009).
23. Khan, S., Arakawa, O. & Onoue, Y. Neurotoxins in a toxic red tide of *Heterosigma akashiwo* (Raphidophyceae) in Kagoshima Bay, Japan. *Aquacult. Res.* **28**, 9-14 (1997).
24. Fredrickson, K. A., Strom, S. L., Crim, R. & Coyne, K. J. Interstrain variability in physiology and genetics of *Heterosigma akashiwo* (Raphidophyceae) from the West Coast of North America. *J. Phycol.* **47**, 25-35(2011).
25. Fuentes-Grunewald, C. et al. Improvement of lipid production in the marine strains *Alexandrium minutum* and *Heterosigma akashiwo* by utilizing abiotic parameters. *J. Ind. Microbiol. Biotechnol.* **39**, 207-16 (2012).
26. Stewart, J. J., Bianco, C. M., Miller, K. R. & Coyne, K. J. (2015) The marine microalga, *Heterosigma akashiwo*, converts industrial waste gases into valuable biomass. *Front. Energy Res.* **3**, 12 (2015).
27. Keeling P. J., Burki, F., Wilcox, H. M., Allam, B. & Allen, E. E. The Marine Microbial Eukaryote Transcriptome Sequencing Project (MMETSP): illuminating the functional diversity of eukaryotic life in the oceans through transcriptome sequencing. *PLoS Biol.* **12**, e1001889 (2014).
28. Zaslavskaja, L. A., Lippmeier, J. C., Kroth, P. G., Grossman, A. R. & Apt, K. E. Transformation of the diatom *Phaeodactylum tricornutum* with a variety of selectable marker and reporter genes. *J. Phycol.* **386**, 379–386 (2000).
29. Fuhrmann, M. et al. Monitoring dynamic expression of nuclear genes in *Chlamydomonas reinhardtii* by using a synthetic luciferase reporter gene. *Plant. Mol. Biol.* **55**, 869-88 (2004).
30. Heitzer, M. & Zschoernig, B. Construction of modular tandem expression vectors for the green alga *Chlamydomonas reinhardtii* using the Cre/lox-system. *Biotechniques* **43**, 324-32 (2007).

31. Duda, K. et al. High-efficiency genome editing via 2A-coupled co-expression of fluorescent proteins and zinc finger nucleases of CRISPR/Cas9 nuclease pairs. *Nucl. Acids. Res.* **42**, e84 (2014).
32. Lobanov, A.V. et al. Position-dependent termination and widespread obligatory frameshifting in *Euplotes* translation. *Nat. Struct. Mol. Biol.* **24**, 61-68 (2017).
33. Prescott, D.M. The DNA of ciliated protozoa. *Microbiol. Rev.* **58**, 233–67 (1994).
34. Klobutcher, L. A. & Jahn C. L. Developmentally controlled genomic rearrangements in ciliated protozoa. *Curr. Opin. Genet. Dev.* **1**, 397–403 (1991).
35. Oborník, M. & Lukeš, J. Cell biology of chromerids, the autotrophic relatives to apicomplexan parasites. *Int. Rev. Cell. Mol. Biol.* **306**, 333-369 (2013).
36. Gornik, S. G., Cranenburgh, A. & Waller, R. F. New host range for *Hematodinium* in southern Australia and novel tools for sensitive detection of parasitic dinoflagellates. *PLoS One* **8**, (12): e82774 (2013).
37. Ryazanova, T. V., Eliseikina, M. G. & Semenchenko, A. A. A new host for *Hematodinium* infection among lithodid crabs from the Sea of Okhotsk. *J. Invertebr. Pathol.* **153**, 12-19 (2018).
38. Stentiford, G. D. & Shields, J. D. A review of the parasitic dinoflagellates *Hematodinium* species and *Hematodinium*-like infections in marine crustaceans. *Dis. Aquat. Organ.* **66**, 47-70 (2005).
39. (Li, 2011).
40. Tomaru, Y. et al. Isolation and characterization of two distinct types of HcRNAV, a single-stranded RNA virus infecting the bivalve-killing microalga *Heterocapsa circularisquama*. *Aquat. Microb. Ecol.* **34**, 207–218 (2004).
41. Nagasaki, K. et al. Comparison of genome sequences of single-stranded RNA viruses infecting the bivalve-killing dinoflagellate *Heterocapsa circularisquama*. *Appl. Environ. Microbiol.* **71**, 8888–8894 (2005).
42. Lin, S. et al. The *Symbiodinium kawagutii* genome illuminates dinoflagellate gene expression and coral symbiosis. *Science* **350**, 691-694 (2015).
43. Anderson, D. M. Bloom dynamics of toxic *Alexandrium* species in the Northeastern US. *Limnol. Oceanogr.* **42**, 1009-1022 (1997).
44. Ortiz-Matamoros, M. F. et al. Heterologous DNA uptake in cultured *Symbiodinium* spp. aided by *Agrobacterium tumefaciens*. *PLoS ONE* **10**, e0132693–16 (2015).
45. Sprecher, B. N., Zhang, H. & Lin, S. Nuclear gene transformation in a dinoflagellate. *bioRxiv* 602821z (2019).
46. Ishii, Y., et al. Isolation of uracil auxotroph mutants of coral symbiont alga for symbiosis studies. *Sci. Rep.* **8**, 3237 (2018).
47. Ebenezer, T. et al. Transcriptome, proteome and draft genome of *Euglena gracilis*. *BMC Biol.* **17**, 11 (2019).
48. Waller, R. F. et al. Strength in numbers: collaborative science for new experimental model systems. *PLOS Biol.* **16**, e2006333 (2018).
49. Sakaue et al. 2008
50. Kilian, O., Benemann, C. S., Niyogi, K. K. & Vick, B. High-efficiency homologous recombination in the oil-producing alga *Nannochloropsis* sp. *Proc. Natl. Acad. Sci. USA* **108**, 21265-21269 (2011).
51. Marie, D., Le Gall, F., Edern, R., Gourvil, P. & Vaultot, D. Improvement of phytoplankton culture isolation using single cell sorting by flow cytometry. *J. Phycol.* **53**, 271-282 (2017).
52. Nielsen, J., Bubela, T., Chalmers, D. R. C., Johns, A. & Kahl, L. Provenance and risk in transfer of biological materials. *PLoS Biol.* **16**, e2006031 (2018).

53. Kahl, L. et al. Opening options for material transfer. *Nat. Biotechnol.* **36**, 923-927 (2018)

Suppl. Fig. 1

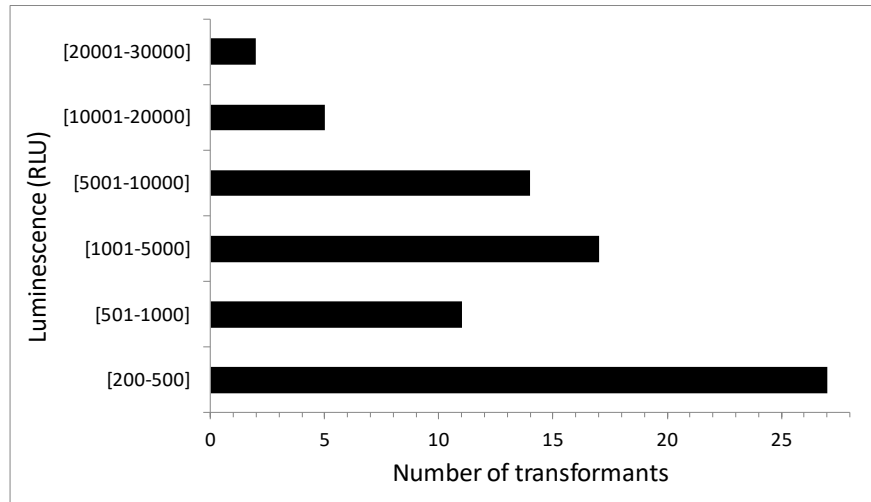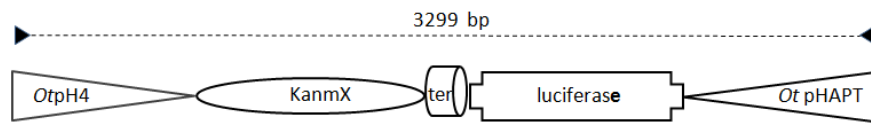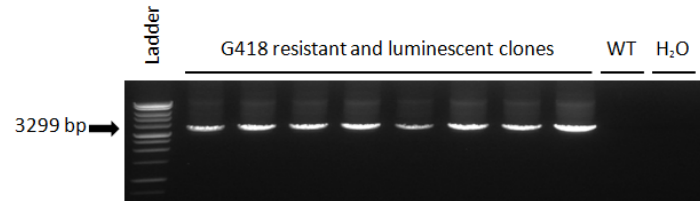

**Stable transformation of *Ostreococcus lucimarinus* RCC802**

**Top:** Luminescence of 76 RCC802 transformed by HAPT:luc transgene, exhibiting luminescence levels at least two fold above RCC802 WT control transformed without DNA (80 RLU). The range of luminescence (RLU) is shown on the Y axis.

**Bottom:** PCR amplification of the transgene (including *O. tauri* histone H4 and HAPT promoters) in 8 RCC802 luminescent lines resistant to G418. A band at the expected size is amplified in all transformants. WT: control cells electroporated without DNA, H<sub>2</sub>O: PCR control.

**Transient expression and stable transformation of selected Mamiellophyceae**

| Species (Transgene)                                                | Transient luciferase expression (RLU/mg of protein) | Stable transformants resistant to G418 (clones/ µg of transgene) | Stable transformants expressing luciferase <sup>1</sup> |
|--------------------------------------------------------------------|-----------------------------------------------------|------------------------------------------------------------------|---------------------------------------------------------|
| <i>O. tauri</i> RCC745 (pH4 :KanMX-pHAPT :Luc) <sup>2</sup>        | 400                                                 | 480 (100)                                                        | 80                                                      |
| <i>O. tauri</i> RCC 1110 (pH4 :KanMX-pHAPT :Luc) <sup>2</sup>      | 600                                                 | 32 (32)                                                          | 32                                                      |
| <i>O. lucimarinus</i> (pH4 :KanMX-pHAPT :Luc RCC 802) <sup>2</sup> | 650                                                 | 480 (96)                                                         | 76                                                      |
| <i>B. prasinos</i> RCC 4222 (pH4 :KanMX-pHAPT :Luc) <sup>3</sup>   | Nd                                                  | 48 (20)                                                          | 14                                                      |
| <i>B. prasinos</i> RCC 4222 (pH4 :KanMX-BCCT) <sup>4</sup>         | Na                                                  | 384 (77) <sup>5</sup>                                            | Na                                                      |

<sup>1</sup>Luminescence two fold above background

<sup>2</sup>*O. tauri* RCC745 Histone (H4) and high affinity phosphate transporter (HAPT) promoters

<sup>3</sup>*B. prasinos* RC4222 Histone (H4) and high affinity phosphate transporter (HAPT) promoters

<sup>4</sup>*B. prasinos* BCCT gene encoding putative DMSP transporter interrupted by pH4:KanMX selection marker to test homologous recombination

<sup>5</sup>No BBCT knock out by homologous recombination were obtained

A

MKTSAIALLAVLATTAA TEP PRRLRTLE GHGGDHSISM  
 SMHSSKA EKQAI EAAVEEDVAGPA KAAKLFKPKASKA  
 GSMPDEAGAKSAKMSMDTKSGKSEDA AAVDAKASKES  
 HMSISGDMSMAKSHKAEAE DVTEMSMAKAGKDEASTE  
 DMCMPFA KSDKEMSVKSKQGK TEMSVADAKASKESSM  
 PSS KAAKIFKSGK SGSL SMLKSEKASSAHSLSMPK  
 AEKVHMSA

B

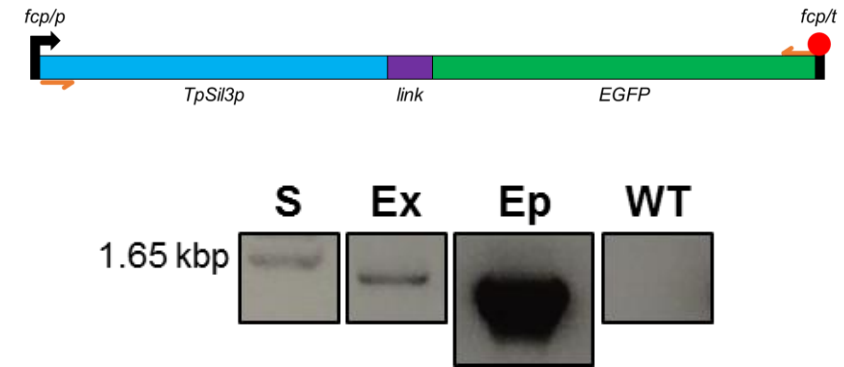

**Suppl. Fig. 2 | TpSil3p features and positive exconjugant confirmation with colony PCR.** (A) TpSil3p amino acid sequence. Orange: signal peptide; underlined: pro-peptide with consecutive RxL motifs (red)—known cleavage sites in biosilicification proteins possibly recognized by signal-1 protease in endoplasmic reticulum or Golgi apparatus (arrows indicate putative cleavage sites); green: pentalysine clusters—12-14 amino acid residues long motifs with 5 non-consecutive lysines—known to promote biosilica association. (B) Top: expression cassette scheme. *fcp/p*: *fcp* promoter; *TpSil3p*: silaffin 3 precursor; *link*: KGSGSTSGSG linker; *EGFP*: enhanced GFP. The whole ORF was optimized for expression in *Tp* using IDT's Codon Optimization Tool (choosing "*Thalassiosira pseudonana*" in the drop down menu). Depicted in orange are colony PCR primers. The expression cassette was inserted into pTpPuc3 32 bp downstream of the HIS3 gene. Bottom: colony PCR result. S: DNA standard; Ex: *Tp* exconjugant; Ep: positive control (episome used for conjugation); WT: wild type *Tp*. 0.5  $\mu$ L cells were genotyped with Phire Plant Direct PCR Master Mix according to the protocol described [here](#). Annealing temperature and extension time were set to 57.5  $^{\circ}$ C and 40 sec, respectively. Expected ~1.45 kb long amplicon was observed in the exconjugant strain corresponding to the full length of designed ORF. Verification primers: Fwd: 5'-ATGAAGACTTCTGCCATTGC-3', Rev: 5'-GATTCACCAATCCAGTATTACTATAGAGCTCGTCCATAC-3'.

#### Suppl. Fig. 2 - References:

- Kröger, N, Bergsdorf, C. & Sumper, M. Frustulins: domain conservation in a protein family associated with diatom cell walls. *Eur. J. Biochem.* **239**, 259–264 (1996).  
 Kröger, N., Deutzmann, R. & Sumper, M. Polycationic Peptides from Diatom Biosilica That Direct Silica Nanosphere Formation. *Science* **286**, 1129–1132 (1999).  
 Pamirsky, I. E. & Golokhvast, K. S. Silaffins of diatoms: from applied biotechnology to biomedicine. *Mar. Drugs* **11**, 3155–3167 (2013).  
 Poulsen, N., Scheffel, A., Sheppard, V. C., Chesley, P. M. & Kröger, N. Pentaly sine Clusters Mediate Silica Targeting of Silaffins in *Thalassiosira pseudonana*. *J. Biol. Chem.* **288**, 20100–20109 (2013).  
 Zhang, K. *et al.* Endoplasmic Reticulum Stress Activates Cleavage of CREBH to Induce a Systemic Inflammatory Response. *Cell* **124**, 587–599 (2006).

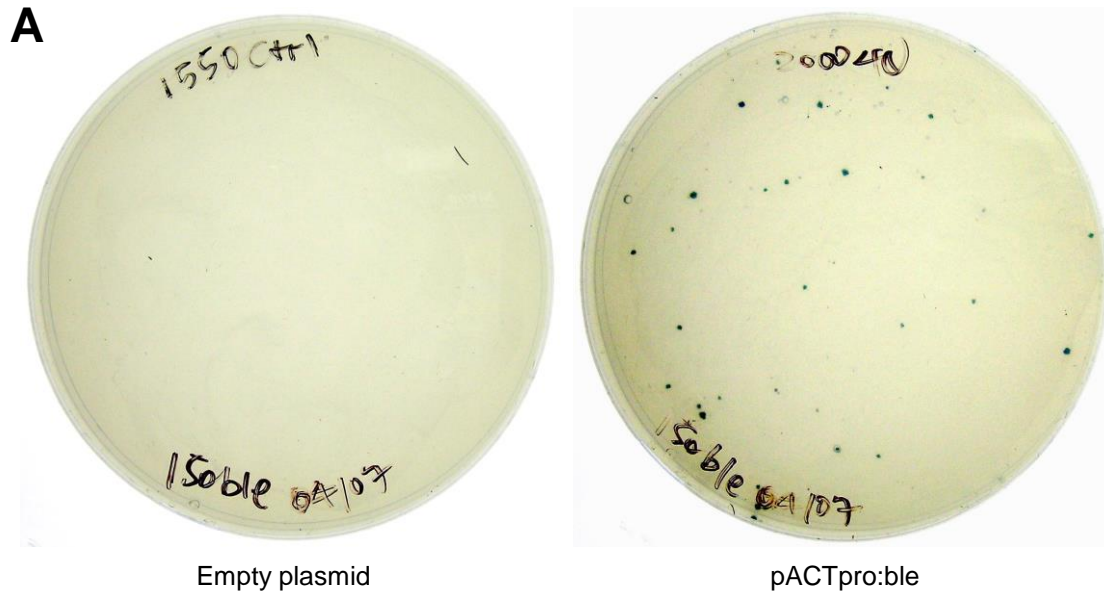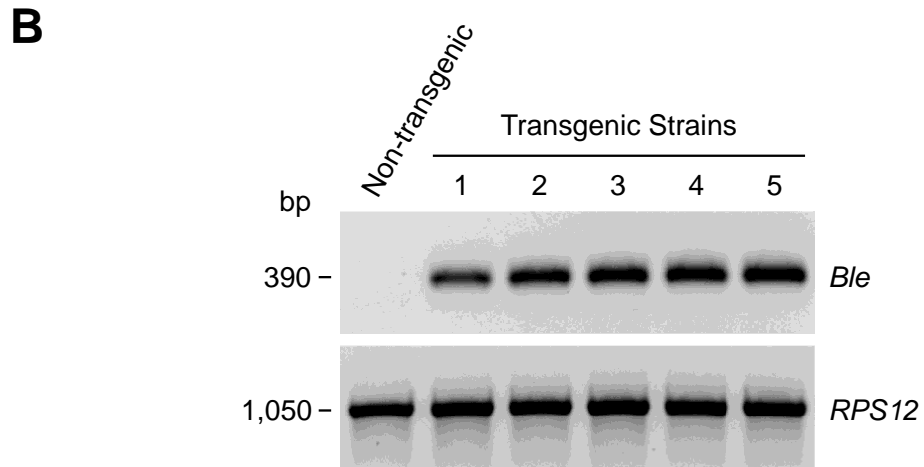

**Suppl. Fig. 3. Transformation of *Tetraselmis striata* (KAS-836), by microprojectile bombardment, with a plasmid (pACTpro:ble) containing a selectable marker consisting of the coding sequence of the *Streptoalloteichus hindustanus* *Ble* gene (conferring resistance to zeocin) under the control of regulatory sequences from the *T. striata* *Actin* gene. (A) Transformants were selected on half-strength f/2 agar plates containing 150  $\mu$ g/ml zeocin. (B) Colonies surviving on the selective plates (or non-transgenic control colonies) were examined by PCR amplification of the *Ble* coding sequence using total genomic DNA as the template. The promoter of the *T. striata* *RPS12* gene (encoding 40S Ribosomal Protein S12) was also amplified as a control for equivalent amount of input DNA in the PCR reactions. The panels show reverse images of ethidium bromide stained PCR products amplified from the non-transgenic recipient strain and from five putative transformants.**



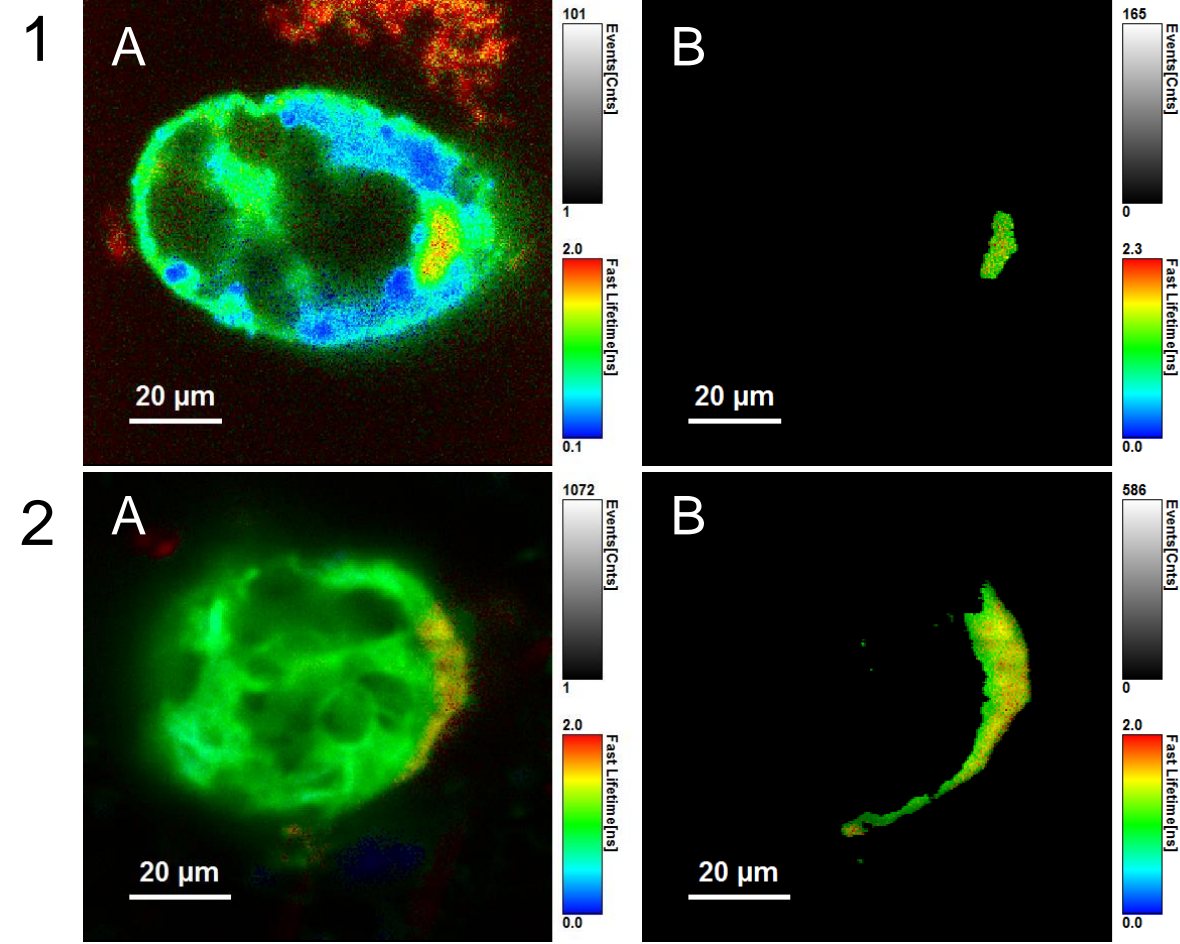

**Suppl. Fig. 4. Fluorescent signal of the plasmid DNA in *E. gymnastica* (1, 3-5) and *P. parkeae* (2).** In case of delivery by nucleofection (1-2), the DNA was labelled by fluorescein and its signal was distinguished from the chlorophyll autofluorescence using fluorescence-lifetime imaging microscopy (FLIM); lifetimes in the whole cells (A) and in the area with longest component (B) is shown. In the case of delivery by standard electroporation (3-5), the DNA was labelled by tetramethylrhodamine and its localization was observed by confocal microscopy (A); XZY scan was performed to determine whether the suspect signal is localized inside the cell or on its surface (B-D): the seemingly successful deliveries are marked by white arrows, the probable extracellular DNA localizations are marked by red arrows, and the ambiguous cases are marked by black arrows.

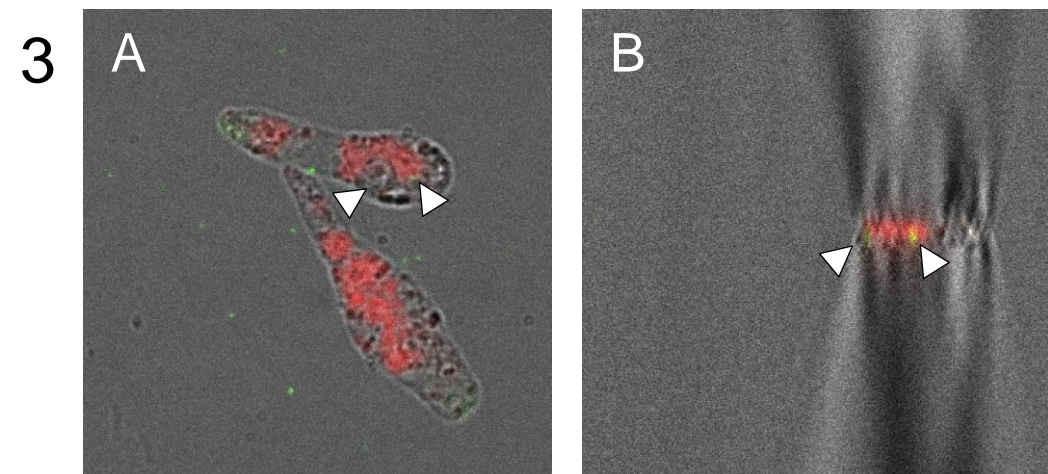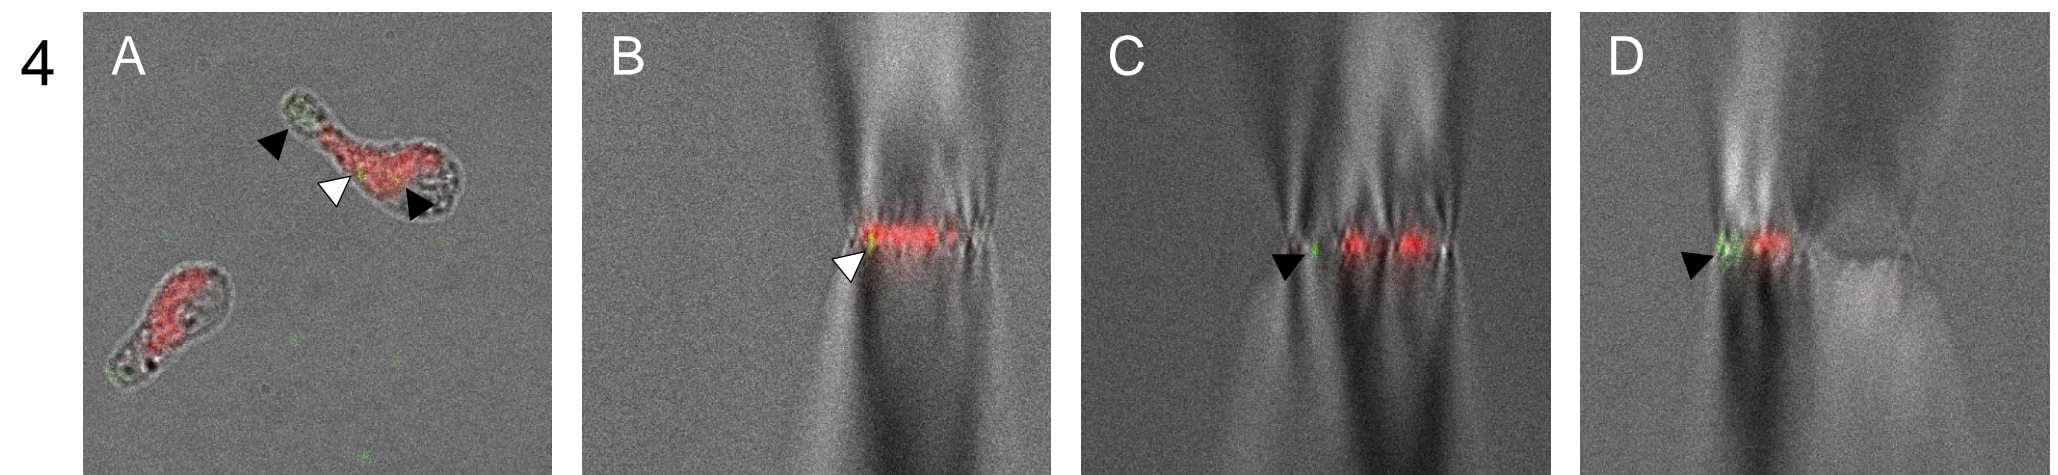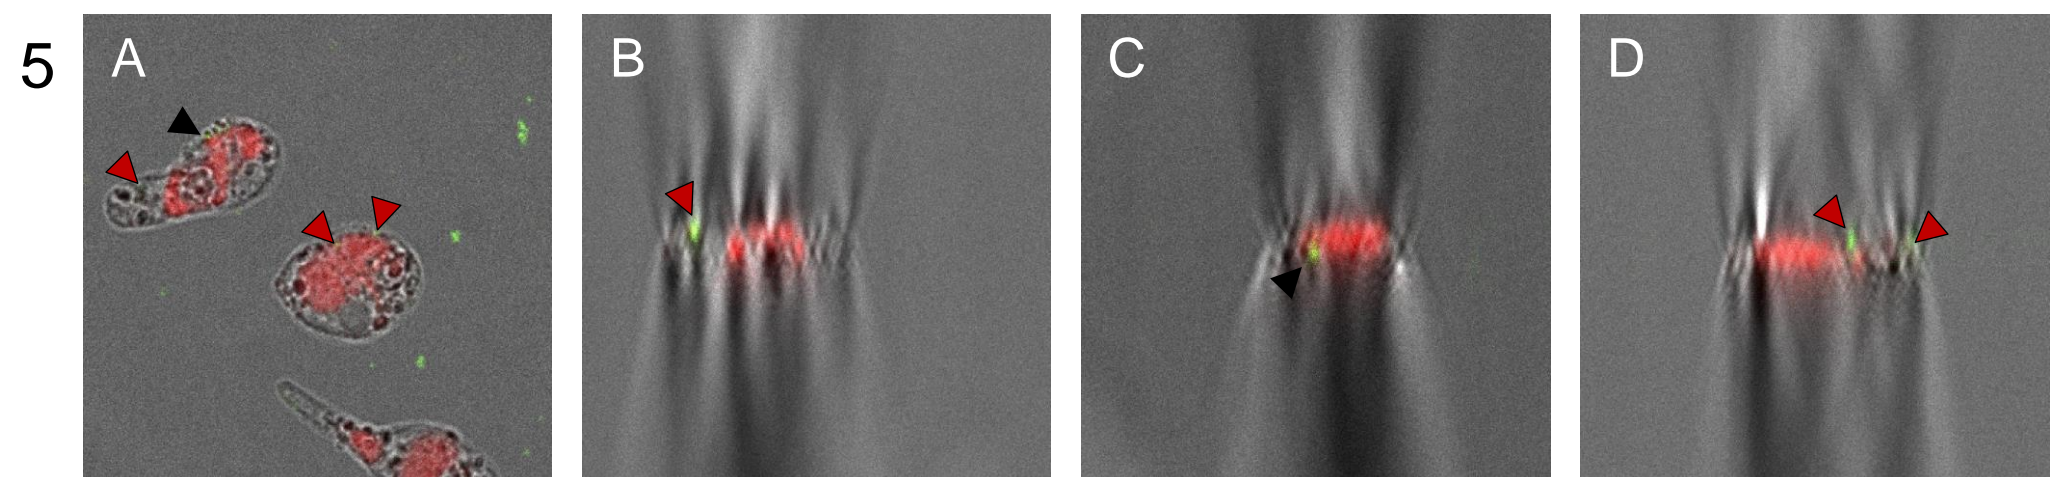



Transformation conditions and efficiencies for *Aurantiochytrium limacinum*.

| Instrument          | Condition             | pUC19_18 GZG DNA | Initial Colonies | Stable Transformants | Efficiency (transformant/ $\mu$ g DNA) |
|---------------------|-----------------------|------------------|------------------|----------------------|----------------------------------------|
| Bio-Rad Gene Pulser | 300 V, 1 pulse        | 10 $\mu$ g       | 10               | 1                    | 0.1                                    |
|                     |                       | 1 $\mu$ g        | 54               | 44                   | 44                                     |
|                     | 450 V, 2 pulses       | 2.5 $\mu$ g      | 62               | 52                   | 20.8                                   |
|                     |                       | 5 $\mu$ g        | 50               | 39                   | 7.8                                    |
| NEPA                | 250 V, 4 ms, 2 pulses | 10 $\mu$ g       | 75               | 68                   | 6.8                                    |
|                     |                       | 1 $\mu$ g        | 25               | 18                   | 18                                     |
|                     |                       | 1 $\mu$ g        | 24               | 13                   | 13                                     |
| NEPA                | 275 V, 8 ms, 2 pulses | 1 $\mu$ g        | 11               | 7                    | 7                                      |
|                     |                       | 1 $\mu$ g        | 24               | 13                   | 13                                     |
|                     |                       | 1 $\mu$ g        | 11               | 7                    | 7                                      |

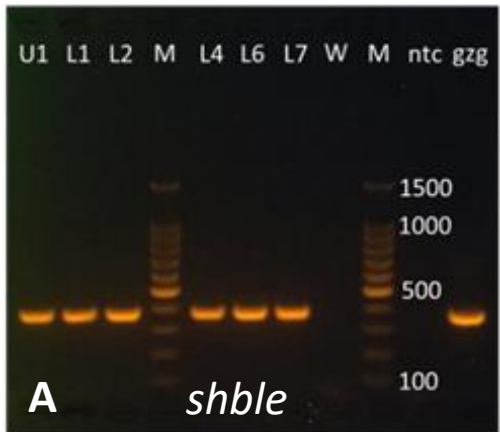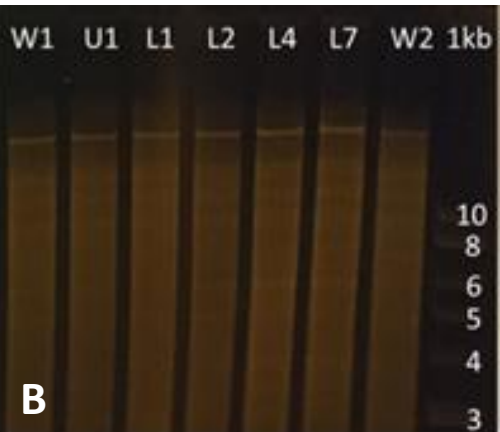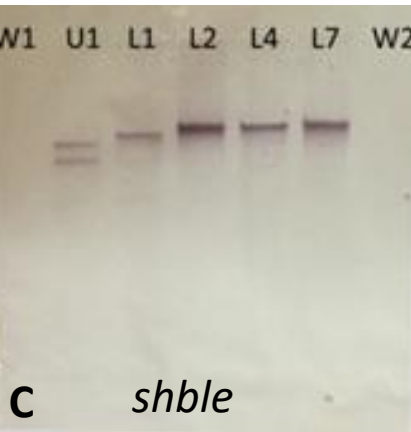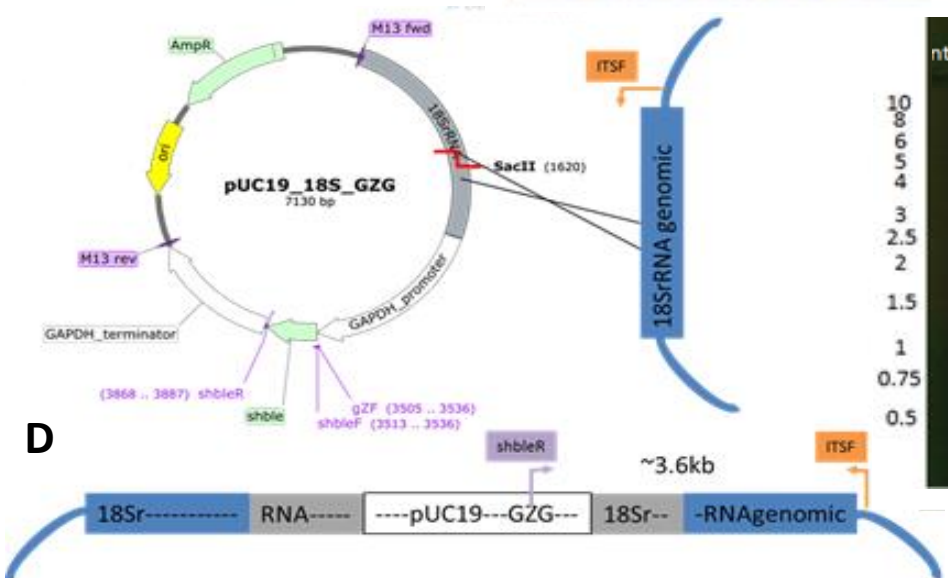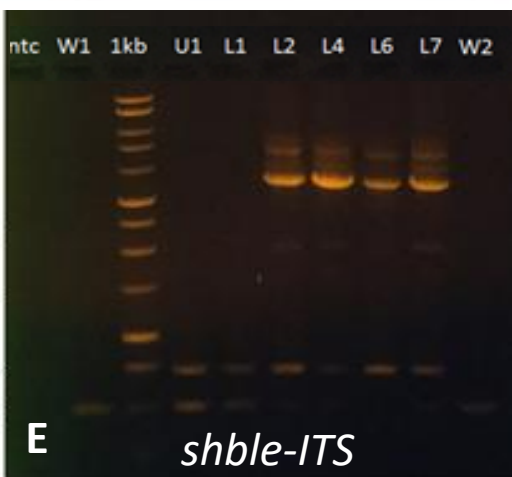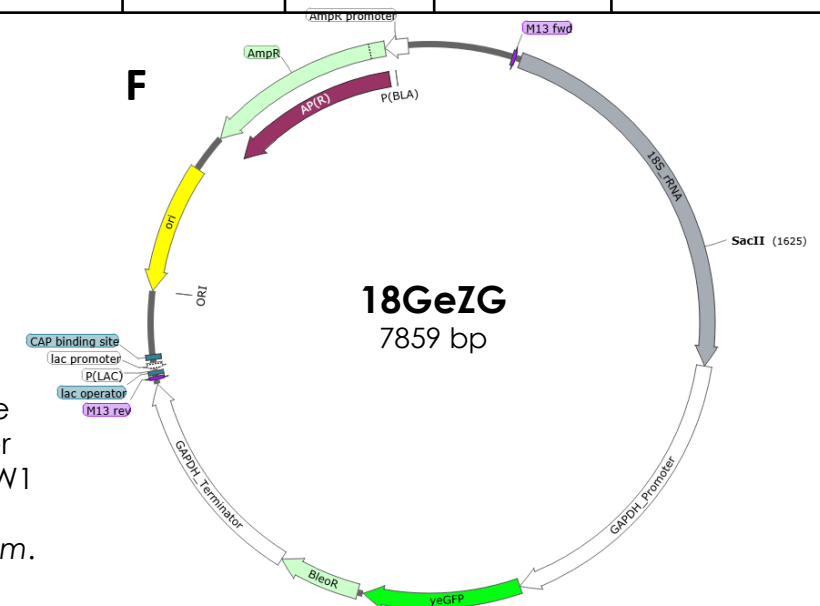

Suppl. Fig. 5

(A) Genomic DNA PCR confirmation of *shble* (375 bp) in six 18GZG transformants (U1, L1, L2, L4, L6, L7). W is the wild-type, *gzg* is the plasmid control, *ntc* is the no template control, and M is a 100 bp marker. (B) Gel electrophoresis of *XhoI* digested genomic DNA from five transformants (U1, L1, L2, L4, L7) and two wildtypes (W1, W2). (C) Developed southern blot using digoxigenin labeled probe of *shble*. (D) Diagram of expected 18GZG plasmid ([addgene.org/117228/](http://addgene.org/117228/)) integration into *Aurantiochytrium limacinum* genome. The *SacII* restriction endonuclease site located in the 18S rRNA region was used for linearization. Plasmid primers annotated in purple, and ITS specific primer in orange (ITSF). (E) Genomic DNA PCR of *shble*-ITS region (3.6 kb) in six putative transformants (U1, L1, L2, L4, L6, L7). W1 & W2 are wild-type and *ntc* is a no template control. L2, L4, L6 and L7 produce the band expected from single homologous recombination. (F) 18GeZG plasmid map, used in *yeGFP::shble* expression in *Aurantiochytrium limacinum*. *SacII* restriction site was used in linearization.

Suppl. Fig. 6

Suppl. Fig. 6: CRISPR-Cas9 Methodology in *Phaeodactylum tricornutum*.

**A.** Vector map of *Phaeodactylum* CRISPR-Cas9 episome. Golden Gate assembly was employed to clone two sgRNA targets and a LacZ positive selection cassette in the episome that contains hCas9. The two sgRNAs are designed to target glutamine synthetase II (GSII, Gene ID: 51092) and glutamate synthase (cGOGAT, Gene ID: 24739). **B.** Red-white-blue screening of golden gate assembled episomes. Positive clones appear blue when the sgRNA and LacZ inserts are supplied (left panel). The vector only control produces red and white colonies since there is no added inserts (right panel). **C.** After transformation of the episome, hCas9 and ShBle are transcriptionally co-expressed and separate upon translation in vivo. The 2A peptide that spans hCas9 and ShBle cleaves itself after translation. **D.** Sequencing alignment analysis of target loci. (Top) Three mutant cell line (1,2,3) and one wild-type sequencing alignment of the Pt\_51092 target locus compared to a reference genomic sequence (green bar). Nucleotides for mutant cell lines are colored red. (Bottom) Three mutant cell lines (1,2,3) and one wild-type sequencing alignment of the Pt\_24739 target locus compared to a reference genomic sequence (green bar). For both alignments, the sgRNA is represented by the teal arrow (arrow direction is 5' to 3') and the blue arrow indicates the predicted hCas9 cut site. **E.** TIDE analysis results. Each sequencing read was compared to a wild-type (shown in D) using TIDE software analysis. The bar plots show the predicted deletion genotype indicated by the dark pink bars ( $p < 0.001$ ) along the x-axis. Each called indel has a number above each bar in the plot that indicates the percentage of the total deconvolved sequence read that individual indel represents.

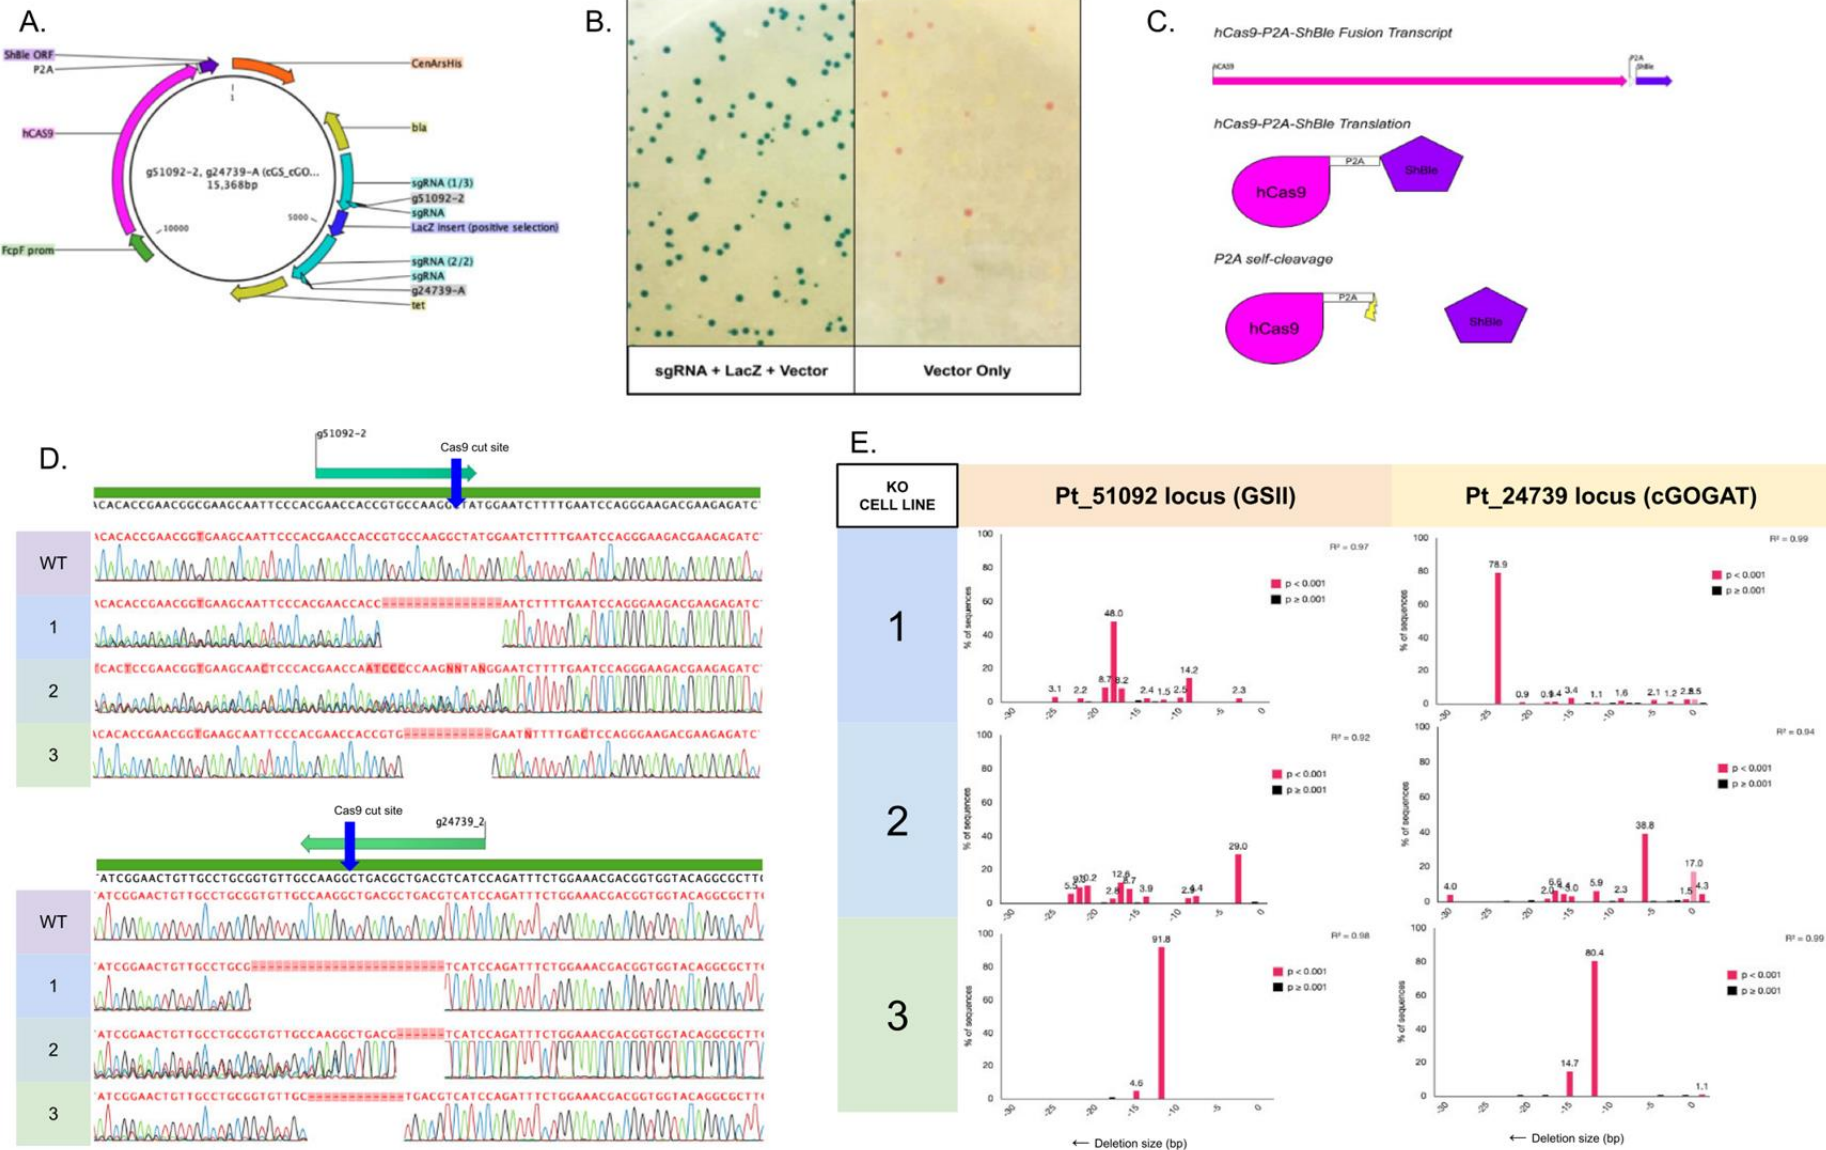

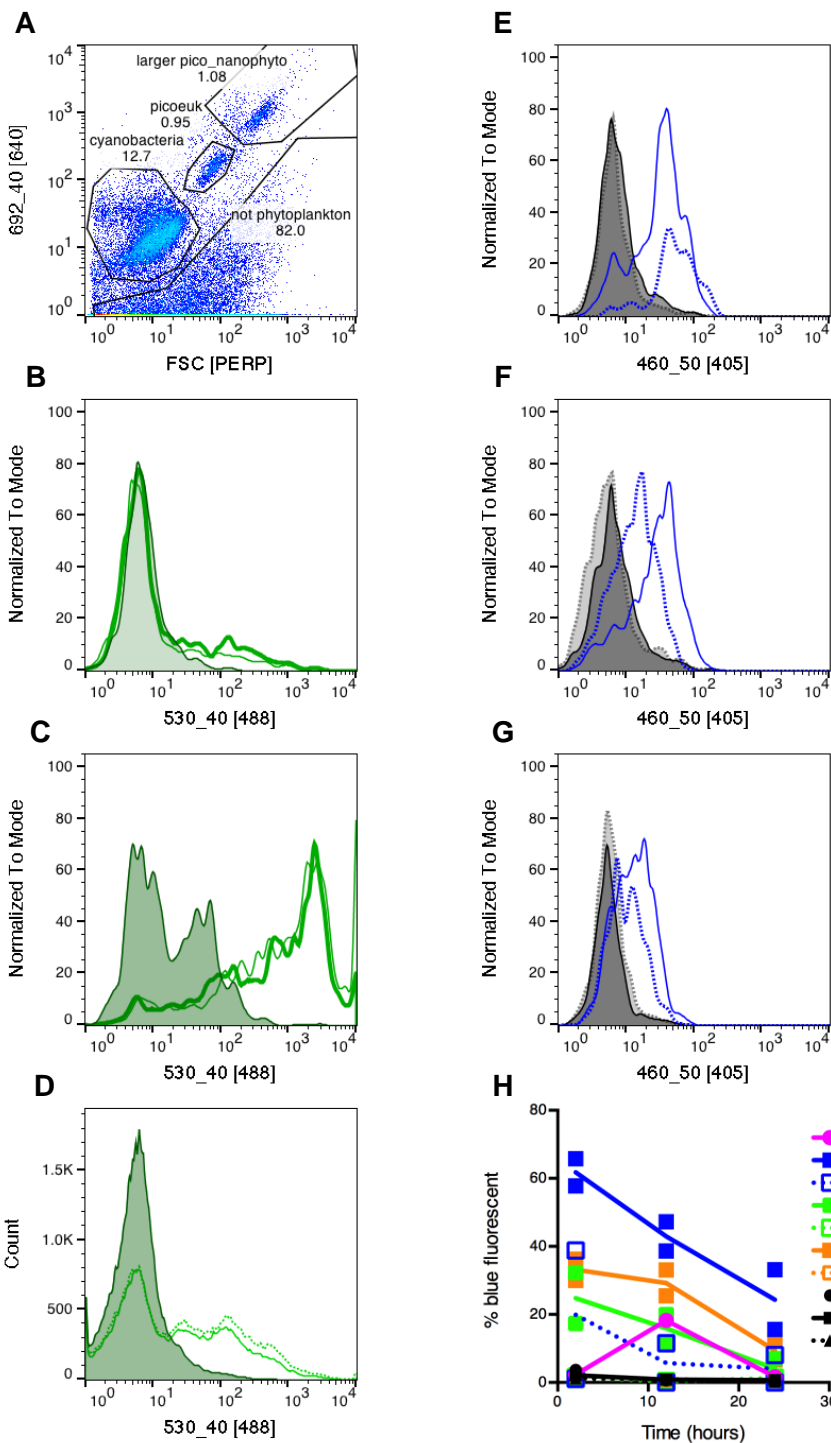

**Suppl. Fig. 7. Transient expression of BFP in natural sea water communities.** Flow cytogram of red fluorescence from chlorophyll excited by the 488 nm laser (692\_40 [488]) versus forward scatter of natural community obtained by concentration of 50 liters of sea water by tangential flow filtration after which cells were washed with sorbitol 800 mM (A). Histograms of green fluorescence (from fluorescein 2000 kD dextran and autofluorescence) in picophytoeukaryote (picoeuk) (B), larger pico-nanophytoeukarotes (C), and nonphytoplankton (D) 2 hours after were electroporated with a pulse of 1 kV for 20 ms (solid line) or a pulse of 2 kV for 8 ms (dashed line). Shaded histogram shows sub-sample incubated with dextran but w/o electroporation. Picophytoeukaryotes electroporated also with (blue) the CMV\_BFP\_pMOD plasmid (blue) or without plasmid (grey) at 1 kV (solid lines) or 2 kV (dashed lines) at 2 hours (E), 12 hours (F), and 24 hours (G). Time course of percentage blue fluorescent cells in picoeukaryotic phytoplankton over time in all treatments (2 replicas per treatment) (H).

**Suppl. Table 1. Major representative previous algal genetic transformation studies.**

| <b>Phylum</b>        | <b>Species</b>                      | <b>Transformation method</b>            | <b>Construct (promoter)</b>                                                            | <b>Selectable marker; selecting agent</b>                | <b>Reporter</b>                                                         | <b>Reference</b>               |
|----------------------|-------------------------------------|-----------------------------------------|----------------------------------------------------------------------------------------|----------------------------------------------------------|-------------------------------------------------------------------------|--------------------------------|
| <b>Alveolates</b>    | <i>Symbiodinium microadriaticum</i> | Si carbide whiskers (SiCaW)             | pMT Npt/GUS (nos, CaMV35S); pMT Hpt/GUS ( <i>Agrobacterium</i> [Agro] p1'2')           | <i>nptII</i> , <i>hpt</i> ; kanamycin, hygromycin*, G418 | Beta-glucuronidase (GUS)                                                | ten Lohuis & Miller (1998)     |
|                      | <i>Symbiodinium</i> spp.            | Agitation with Glass beads              | <i>pCB302-gfp-AtRACK1C</i> , <i>pCAMBIA-FABD2-gfp</i> (CaMV35S)                        | <i>bar</i> , <i>hpt</i> ; Basta, hygromycin              | Green fluorescent protein (GFP)                                         | Ortiz-Matamoros et al. (2015a) |
|                      |                                     | Glass beads and co-incubation with Agro | <i>pCB302-gfp-AtRACK1C</i> , <i>pCB302-gfp-MBD</i> , <i>pCB302-gfp-FABD2</i> (CaMV35S) | <i>bar</i> ; Basta                                       | Green fluorescent protein (GFP)                                         | Ortiz-Matamoros et al. (2015b) |
|                      | <i>Amphidinium carterae</i>         | SiCaW                                   | pMT Npt/GUS (nos, CaMV35S); pMT Hpt/GUS ( <i>Agro</i> p1'2')                           | <i>nptII</i> , <i>hpt</i> ; hygromycin*, G418, kanamycin | GUS                                                                     | ten Lohuis & Miller (1998)     |
| <b>Stramenopiles</b> | <i>Phaeodactylum tricornutum</i>    | Biolistics                              | ( <i>fcp</i> [fucoxanthin chlorophyll-a or -c binding protein])                        | <i>ShBle</i> (phleomycin/zeocin)                         | Luciferase (LUC)                                                        | Falciatore et al. (1999)       |
|                      |                                     | Biolistics                              | <i>pfcpA</i> ( <i>fcp</i> [fucoxanthin chlorophyll-a or -c binding protein])           | <i>ShBle</i> (phleomycin/zeocin)                         | Chloramphenicol acetyltransferase (CAT)                                 | Apt et al. (1996)              |
|                      |                                     | Electroporation                         | <i>pHY11-cat</i> (native NR promoter)                                                  | <i>cat</i> ; chloramphenicol                             | CAT                                                                     | Niu et al. (2012)              |
|                      |                                     | Conjugation                             | <i>p0521S/CEN6-ARSH4-HIS3/pfcpA</i>                                                    | <i>shble</i>                                             | Cyan fluorescence protein (CFP), GFP, Yellow fluorescence protein (YFP) | Karas et al. (2015)            |

|                                                              |                     |                                                                       |                                                                       |                                      |                           |
|--------------------------------------------------------------|---------------------|-----------------------------------------------------------------------|-----------------------------------------------------------------------|--------------------------------------|---------------------------|
| <i>Cyclotella criptica</i>                                   | Biolistics          | plasmids with nptII (diatom acetyl-CoA carboxylase promoter)          | <i>nptII</i> ; G418                                                   | Expression of NPTII                  | Dunahay et al. (1995)     |
| <i>Navicular saprophila</i>                                  | Biolistics          | plasmids with nptII (diatom acetyl-CoA carboxylase promoter)          | <i>nptII</i> ; G419                                                   | Expression of NPTII                  | Dunahay et al. (1995)     |
| <i>Cylindrotheca fusiformis</i>                              | Biolistics          | pHUPtag- <i>fcp</i> (fucoxanthin chlorophyll-a or -c binding protein) | <i>ble/frue</i> , <i>ble</i> /HUPtag; zeocin, kanamycin, hygromycin B |                                      | Fischer et al. (1999)     |
| <i>Conticribra (Thalassiosira) weissflogii</i>               | Biolistics          | ( <i>fcp</i> [fucoxanthin chlorophyll-a or -c binding protein])       |                                                                       | Luciferase (LUC)                     | Falciatore et al. (1999)  |
| <i>Pseudo-nitzschia multistriata</i> , <i>P. arenysensis</i> | Bioballistic        | Histone H4                                                            | <i>Shble</i> , zeocin                                                 | Growth on selective medium           | Sabatino et al. 2015      |
| <i>Thalassiosira pseudonana</i>                              | Biolistics          | pTpNR/GFP (nitrate inducible NR promoter)                             | <i>Nat</i> (nourseothricin)                                           | EGFP                                 | Poulsen & Chesley (2006)  |
| <i>Thalassiosira pseudonana</i>                              | Conjugation         | pTpExpPEPCK-YFP (LHCF9 promoter_                                      | <i>Nat</i> (nourseothricin)                                           | Yellow fluorescent protein (YFP)     | Karas et al. (2015)       |
| <i>Nannochloropsis</i> sp.                                   | Electroporation     | <i>pVCP1</i>                                                          | <i>shble</i>                                                          |                                      | Kilian et al. (2011)      |
| <i>Nannochloropsis gaditana</i>                              | Electroporation     | <i>pTUB/pHSP/pUEP/</i>                                                | <i>shble</i>                                                          |                                      | Radakovits et al. (2013)  |
| <i>Nannochloropsis oceanica</i>                              | Electroporation     | <i>pCMV-EM7</i>                                                       | <i>sheble</i>                                                         |                                      | Osorio et al. (2019)      |
| <b>Archaeplastids</b>                                        | Glass beads         | <i>pMN24</i> (containing native fragments)                            | <i>nr</i> ; nitrate                                                   | Growth on selective medium (nitrate) | Kindle (1990)             |
| <i>Chlamydomonas reinhardtii</i>                             | Electroporation     | <i>pJD67</i> carrying ARG7                                            | <i>arg7</i>                                                           | Growth on corn starch                | Shimogawara et al. (1998) |
|                                                              | Si carbide whiskers | <i>pMN24</i> based on pUC19 (containing native NR)                    | <i>nr</i> , nitrate                                                   | Growth on selective medium (nitrate) | Dunahay (1993)            |

|                                |                                     |                                                                              |                                          |                                          |                           |
|--------------------------------|-------------------------------------|------------------------------------------------------------------------------|------------------------------------------|------------------------------------------|---------------------------|
|                                | Biolistics                          | pU12.6 (containing ASL)                                                      | argininosuccinate lyase (ASL); AS        | Growth on selective medium               | Debuchy et al. (1989)     |
|                                | Biolistics                          | pUC19                                                                        | OEE1, oxygen-evolving enhancer protein 1 | Growth on selective medium (-acetate)    | Mayfield & Kindle (1990)  |
|                                | <i>Agrobacterium tumefaciens</i> ** | T-DNA                                                                        | <i>hpt</i> ; hygromycin                  | GUS, GFP                                 | Kumar et al. (2004)       |
| <i>Chlorella ellipsoidea</i>   | Biolistics                          | pDO432                                                                       |                                          | LUC                                      | Jarvis & Brown (1991)     |
|                                | Electroporation                     | (Ubil- $\Omega$ )                                                            |                                          | GUS                                      | Chen et al. (2001)        |
| <i>Chlorella saccharophila</i> | Electroporation                     | PBI221 (CaMVS35)                                                             |                                          | GUS                                      | Maruyama et al. (1994)    |
| <i>Chlorella vulgaris</i>      | Protoplast transformation           |                                                                              | <i>kanr</i> ; G418                       | Expression of human growth hormone (hGH) | Hawkins & Nakamura (1999) |
|                                | Electroporation                     | pMD18-Apca $t$ (NR promoter)                                                 | <i>cat</i> ; chloramphenicol             |                                          | Niu et al. (2011)         |
| <i>Haematococcus pluvialis</i> | Biolistics                          | pSV40-LacZ (SV40)                                                            |                                          | $\beta$ -galactosidase (LacZ)            | Teng et al. (2002)        |
| <i>Ostreococcus tauri</i>      | Electroporation                     | <i>Potluc</i><br><i>Potox</i>                                                | KanMX, G418<br>Nat1, cloNat              | LUC                                      | Corellou et al. [2009]    |
|                                | Electroporation                     | PCR product including 1kbp of ferritin homologous sequence                   | KanMx, G418                              | LUC (Knock in)                           | Lozano et al. [2014]      |
| <i>Dunaliella salina</i>       | Electroporation                     | PBI221, pUGUS, pU $\Omega$ GUS, P35U $\Omega$ GUS (CaMVS35, Ubil- $\Omega$ ) |                                          | GUS                                      | Geng et al. (2003)        |
|                                | Electroporation                     |                                                                              | <i>ble</i> ; Zeocin                      |                                          | Sun et al. (2005)***      |
|                                | Biolistics                          | (CaMV35S promoter)                                                           | <i>bar</i> ; Basta                       | GUS                                      | Tan et al. (2005)         |



|            |                                                  |            |                             |                  |
|------------|--------------------------------------------------|------------|-----------------------------|------------------|
| Biolistics | pDM307 (native CA [carbonic anhydrase] promoter) | bar; Basta | Nitric oxide synthase (NOS) | Lü et al. (2005) |
|------------|--------------------------------------------------|------------|-----------------------------|------------------|

\*found to be most effective; \*\* shown to work better than glass beads; \*\*\* some introduced DNA stayed as episomal plasmid DNA

### References for Suppl. Table 1:

- ten Lohuis, M. R. & Miller, D. J. Genetic transformation of dinoflagellates (*Amphidinium* and *Symbiodinium*): expression of GUS in microalgae using heterologous promoter constructs. *Plant J.* **13**, 427-435. (1998).
- Ortiz-Matamoros, M. F., Villanueva, M. A., & Islas-Flores, T. Transient transformation of cultured photosynthetic dinoflagellates (*Symbiodinium* spp.) with plant-targeted vectors. *Ciencias Marinas* **41**, 21-32. (2015a).
- Ortiz-Matamoros, M. F., et al. Heterologous DNA Uptake in Cultured *Symbiodinium* spp. Aided by *Agrobacterium tumefaciens*. *PLoS ONE* **10**, e0132693. (2015b).
- Falciatore, A., Casotti, R., Leblanc, C., Abrescia, C. & Bowler, C. Transformation of nonselectable reporter genes in marine diatoms. *Mar. Biotechnol.* **1**, 239-251 (1999).
- Apt, K. E., Kroth-Pancic, P. G. & Grossman, A. R. Stable nuclear transformation of the diatom *Phaeodactylum tricornutum*. *Mol. Gen. Genet.* **252**, 572-579 (1996).
- Niu, Y.-F., et al. Transformation of diatom *Phaeodactylum tricornutum* by electroporation and establishment of inducible selection marker. *BioTechniques* **52**, 1-3 (2012).
- Karas, B. J. et al. Designer diatom episomes delivered by bacterial conjugation. *Nat. Commun.* **6**, 6925 (2015).
- Dunahay, T., Jarvis, E. & Roessler, P. Genetic transformation of the diatoms *Cyclotella cryptica* and *Navicula saprophita*. *J. Phycol.* **31**, 1004-1012 (1995).
- Fischer, H., Robl, I., Sumper, M. & Kröger, N. Targeting and covalent modification of cell wall and membrane proteins heterologously expressed in the diatom *Cylindrotheca fusiformis*. *J. Phycol.* **35**, 113-120 (1999).
- Falciatore, A., Casotti, R., Leblanc, C., Abrescia, C. & Bowler, C. Transformation of nonselectable reporter genes in marine diatoms. *Mar. Biotechnol.* **1**, 239-251 (1999).
- Sabatino, V., Russo M. T., Patil S., d'Ippolito G., Fontana A., and Ferrante M. I. Establishment of genetic transformation in the sexually reproducing diatoms *Pseudo-nitzschia multistriata* and *Pseudo-nitzschia arenysensis* and inheritance of the transgene. *Marine Biotechnology* **17**: 452-462 (2015).
- Poulsen, N., Chesley, P. M. & Kröger, N. MOLECULAR GENETIC MANIPULATION OF THE DIATOM *THALASSIOSIRA PSEUDONANA* (BACILLARIOPHYCEAE). *J. Phycol.* **42**, 1059-1065 (2006).
- Kilian, O., et al. High-efficiency homologous recombination in the oil-producing alga *Nannochloropsis* sp. *Proc. Natl. Acad. Sci. USA* **108**, 21265-21269 (2011)

- Radakovits, R. et al. Draft genome sequence and genetic transformation of the oleaginous alga *Nannochloropsis gaditana*. *Nature Communications* **3**, 686 (2013).
- Osorio, H., et al. High-efficiency nuclear transformation of the microalgae *Nannochloropsis oceanica* using Tn5 Transposome for the generation of altered lipid accumulation phenotypes. *Biotechnology for Biofuels* **12**, 134 (2019).
- Kindle, K. L. High-frequency nuclear transformation of *Chlamydomonas reinhardtii*. *Proc. Natl. Acad. Sci. USA* **87**, 1228-1232 (1990).
- Shimogawara, K., Fujiwara, S., Grossman, A. and Usuda, H. High-efficiency transformation of *Chlamydomonas reinhardtii* by electroporation. *Genetics*, **148**, 1821-1828 (1998).
- Dunahay, T. G. Transformation of *Chlamydomonas reinhardtii* with silicon carbide whiskers. *BioTechniques* **15**, 452-460 (1993).
- Debuchy, R., Purton, S. and Rochaix, J.D. The argininosuccinate lyase gene of *Chlamydomonas reinhardtii*: an important tool for nuclear transformation and for correlating the genetic and molecular maps of the ARG7 locus. *The EMBO journal*, **8**, 2803-2809 (1989).
- Mayfield, S. P., Kindle, K. L. Stable nuclear transformation of *Chlamydomonas reinhardtii* by using a *C. reinhardtii* gene as the selectable marker. *Proc. Natl. Acad. Sci. USA* **87**, 2087-2091 (1990).
- Kumar, S. C., Misqitta, R. W., Reddy, V. S., Rao, J. B. & Rajam, M. V. Genetic transformation of the green alga *Chlamydomonas reinhardtii* by *Agrobacterium tumefaciens*. *Plant Sci.* **166**, 731-738 (2004).
- Jarvis, E.E. and Brown, L.M. Transient expression of firefly luciferase in protoplasts of the green alga *Chlorella ellipsoidea*. *Current genetics*, **19**, 317-321. (1991).
- Chen, Y., Wang, Y., Sun, Y., Zhang, L. and Li, W. Highly efficient expression of rabbit neutrophil peptide-1 gene in *Chlorella ellipsoidea* cells. *Current genetics*, **39**, 365-370 (2001).
- Maruyama, M., et al. Introduction of foreign DNA into *Chlorella saccharophila* by electroporation. *Biotechnol. Techn.* **8**, 821-826 (1994).
- Hawkins, R.L. and Nakamura, M. Expression of human growth hormone by the eukaryotic alga, *Chlorella*. *Current Microbiology*, **38**, 335-341 (1999).
- Niu, Y. F., et al. A new inducible expression system in a transformed green alga, *Chlorella vulgaris*. *Genet. Mol. Res.* **10**, 3427-3434 (2011).
- Teng, C., et al. Transient expression of lacZ in bombarded unicellular green alga *Haematococcus pluvialis*. *Journal of Applied Phycology*, **14**, 497-500 (2002).
- Corellou et al. Clocks in the green lineage: comparative functional analysis of the circadian architecture of the picoeukaryote *Ostreococcus*. *Plant Cell*, **21**, 3436-3449 (2009).
- Lozano et al. Efficient gene targeting and removal of foreign DNA by homologous recombination in the picoeukaryote *Ostreococcus*. *Plant J.* **78**, 1073-1083. (2014).
- Geng, D., Wang, Y., Wang, P., Li, W. & Sun, Y. Stable expression of hepatitis B surface antigen gene in *Dunaliella salina* (Chlorophyta). *J. Appl. Phycol.* **15**, 451-456 (2003).



Sun, Y., et al. Expression of foreign genes in *Dunaliella* by electroporation. *Mol. Biotechnol.* **30**, 185-192 (2005).

Tan, C., Quin, S., Zhang, Q., Jiang, P. & Zhao, F. Establishment of a micro-particle bombardment transformation system for *Dunaliella salina*. *J Microbiol.* **43**, 361-365 (2005).

Lü, Y. M., et al. Cloning and functional analyses of promoters of two carbonic anhydrase genes from *Dunaliella salina*. *Acta Genet. Sin.* **31**, 1157-1166 (2004).

**Suppl. Table 2. Selected physiological and ecological characteristics of the protists targeted in this study.**

| Species                                        | Feeding (auto/hetero/mixo)      | Habitat                                                    | Cell walls                                                                                              | Cell structure                                                                                                                                         | Life cycle                                                              | Planktonic? |
|------------------------------------------------|---------------------------------|------------------------------------------------------------|---------------------------------------------------------------------------------------------------------|--------------------------------------------------------------------------------------------------------------------------------------------------------|-------------------------------------------------------------------------|-------------|
| <b>Archaeplastids</b>                          |                                 |                                                            |                                                                                                         |                                                                                                                                                        |                                                                         |             |
| <i>Ostreococcus lucimarinus</i>                | photoautotroph                  | marine                                                     | no visible cell wall, just thin membrane                                                                | small (~1 µm); atypical prasinophyte (no flagella, no scales) (Worden et al., 2004)                                                                    | asexual by binary fission, possible sexual cycle                        | yes         |
| <i>Bathycoccus prasinos</i>                    | photoautotroph                  | marine                                                     | organic scales                                                                                          | small (~2-3 µm); cells covered by scales of unknown organic material. no flagellum. (Limardo et al., 2017)                                             | asexual by binary fission, possible sexual cycle                        | yes         |
| <i>Micromonas commoda</i>                      | photoautotroph                  | marine                                                     | no visible cell wall, just thin membrane                                                                | small (~1-2 µm); single flagellum, no scales; phototactic (positive)                                                                                   | asexual by binary fission, possible sexual cycle                        | yes         |
| <i>Micromonas pusilla</i>                      | photoautotroph                  | marine                                                     | no visible cell wall, just thin membrane                                                                | small (~1-2 µm); single flagellum; phototactic (positive); Encodes most of peptidoglycan pathway from cyanobacterial endosymbiont that formed plastid. | asexual by binary fission, possible sexual cycle                        | yes         |
| <i>Tetraselmis striata</i>                     | photoautotroph                  | marine coastal; most free-living but some animal symbionts | complex polysaccharide scales fuse to form a wall; cell anchored to wall by microtubules in four places | 3-25 µm, two pairs of flagella with complex scales etc covering, one large chloroplast; accumulates HUFA                                               | flagellated stage, vegetative non-motile stage (usually dominant), cyst | yes         |
| <i>Pyramimonas parkeae</i>                     | photoautotroph                  | marine                                                     | wall-less                                                                                               | 20 x 15 µm                                                                                                                                             | four flagella                                                           | yes         |
| <b>Haptophytans</b>                            |                                 |                                                            |                                                                                                         |                                                                                                                                                        |                                                                         |             |
| <i>Isochrysis galbana</i>                      | photoautotrophic                | marine                                                     | thin layer of organic scales, non-calcified                                                             | 5-6µm, two flagella, 2 chloroplasts, stigma, oil droplets.                                                                                             | Asexual by binary fission, cyst                                         | yes         |
| <i>Emiliana huxleyi</i>                        | photoautotrophic                | marine, broadly distributed                                | calcium carbonate plates (coccoliths)                                                                   | ~5 µm                                                                                                                                                  | diploid calcified stage, motile non-calcified haploid stage             | yes         |
| <b>Rhizarians</b>                              |                                 |                                                            |                                                                                                         |                                                                                                                                                        |                                                                         |             |
| <i>Amorphochlora (Lotharella) amoebiformis</i> | photomixotrophic (eat bacteria) | marine                                                     | none                                                                                                    | Amoeboid cell (8-15 µm) with many filopodia.                                                                                                           | asexual by binary fission                                               | no          |

|                            |                                 |                             |                                                                                |                                                                                                                                                                                                                                                                                                                                                                                                                                                   |                                                                                                                                                                                  |     |
|----------------------------|---------------------------------|-----------------------------|--------------------------------------------------------------------------------|---------------------------------------------------------------------------------------------------------------------------------------------------------------------------------------------------------------------------------------------------------------------------------------------------------------------------------------------------------------------------------------------------------------------------------------------------|----------------------------------------------------------------------------------------------------------------------------------------------------------------------------------|-----|
| <i>Bigelowiella natans</i> | photomixotrophic (eat bacteria) | marine, broadly distributed | vegetative cells usually naked; this cell wall only in 'cysts' in old cultures | Amoeboid, thin filopodia (thread-like pseudopodia); sometimes reticulopodia); or coccoid cells with multilayered cell wall; or uniflagellated zoospores. store β-1,3 glucan (not starch). Mitochondria with tubular cristae. Nucleomorph genome ~400 kb (3 linear chromosomes), coding 17 plastid genes and ~350 housekeeping genes with lots of small (~20 bp) introns. Secondary endosymbiosis between cercozoan host and green algal symbiont. | some species have all three cell types, many are missing one or another; which form is the main vegetative stage differs among species. Chlorarachnion may have amoeboid gamete! | yes |
|----------------------------|---------------------------------|-----------------------------|--------------------------------------------------------------------------------|---------------------------------------------------------------------------------------------------------------------------------------------------------------------------------------------------------------------------------------------------------------------------------------------------------------------------------------------------------------------------------------------------------------------------------------------------|----------------------------------------------------------------------------------------------------------------------------------------------------------------------------------|-----|

### Stramenopiles

|                                            |                                 |                                                         |                                                               |                                                                       |                                                                                                                                             |                    |
|--------------------------------------------|---------------------------------|---------------------------------------------------------|---------------------------------------------------------------|-----------------------------------------------------------------------|---------------------------------------------------------------------------------------------------------------------------------------------|--------------------|
| <i>Fragilariopsis cylindrus</i>            | photoautotrophic                | polar oceans and sea ice; ice edge blooms               | silica                                                        |                                                                       |                                                                                                                                             | yes                |
| <i>Thalassiosira pseudonana</i>            | photoautotrophic                | oceanic, coastal temperate, possible bacterial symbiont | silica and organics (long-chain polyamines, chitin, proteins) | ~5-10 μm                                                              | size reduction–restitution cycle (SRRC); asexual by binary fission accompanied by cell size reduction, cell size restored in a sexual cycle | yes                |
| <i>Seminavis robusta</i>                   | photoautotrophic                | benthic                                                 | silica                                                        | ~10x50 μm; pennate                                                    |                                                                                                                                             | no                 |
| <i>Pseudo-nitzscha multiseriata</i>        | photoautotrophic                | HAB-forming but otherwise rare; toxic; coastal neretic  | silica                                                        | ~5x100 μm; pennate, chain-forming;                                    |                                                                                                                                             | yes                |
| <i>Pseudo-nitzscha australis</i>           | photoautotrophic                | HAB-forming but otherwise rare; toxic; coastal neretic  | silica                                                        | ~5x100 μm; pennate, chain-forming;                                    |                                                                                                                                             | yes                |
| <i>Heterosigma akashiwo</i>                | photoautotrophic                | diverse; some form HAB                                  | naked                                                         | ~50-100 μm, heterokont flagella                                       |                                                                                                                                             | yes                |
| <i>Aurantiochytrium limacinum</i> MYA-1381 | osmoheterotrophic; stores PUFAS | marine (plant detritus)                                 | sulfated polysaccharide scales                                | 4 - 20 μm; grow attached by ectoplasmic net elements or in suspension | probably asexual reproduction by zoospores                                                                                                  | mero <sup>-1</sup> |
| <i>Caecitellus</i> sp.                     | phagoheterotrophic              |                                                         | none?                                                         | <5 μm; gliding motility, raptorial feeding                            |                                                                                                                                             | yes                |

|                                          |                                                      |                                                                |                                                                                                                             |                                                                                                                                                      |                                                                                           |                                           |
|------------------------------------------|------------------------------------------------------|----------------------------------------------------------------|-----------------------------------------------------------------------------------------------------------------------------|------------------------------------------------------------------------------------------------------------------------------------------------------|-------------------------------------------------------------------------------------------|-------------------------------------------|
| <i>Nannochloropsis oceanica</i>          | photoautotroph                                       | marine waters worldwide                                        | Smooth cell wall, composed of principally cellulose and algaenan, with papilla                                              | <5 µm ovoid cells, non-motile                                                                                                                        | asexual reproduction; may be ameiotic                                                     | yes                                       |
| <i>Phaeodactylum tricornutum</i>         | photoautotrophic                                     | brackish and marine waters worldwide                           | oval morphotype silicified, other morphotypes very lightly silicified, sulfated α-mannan decorated with glucuronic residues | polymorphic (exists as oval, fusiform, triradiate, cruciform morphotype), ~5x30 µm (fusiform), ~10 µm ovoid gliding motility (oval), can form chains | asexual by binary fission, possible sexual cycle                                          | yes (oval type benthic)                   |
| <b>Alveolates</b>                        |                                                      |                                                                |                                                                                                                             |                                                                                                                                                      |                                                                                           |                                           |
| <i>Euplotes crassus</i>                  | phagoheterotrophic                                   | marine                                                         | rigid pellicle                                                                                                              | ~50-100 µm; hypotrichous ciliate                                                                                                                     | asexual by binary fission and sexual by conjugation or autogamy                           | yes                                       |
| <i>Euplotes focardi</i>                  | phagoheterotrophic                                   | marine f=antarctic                                             | rigid pellicle                                                                                                              | ~50-100 µm; hypotrichous ciliate                                                                                                                     | asexual by binary fission and sexual by conjugation                                       | yes                                       |
| <i>Chromera velia</i>                    | photoautotroph?                                      | coral reef coral-associated, possibly non-facultative symbiont | thick cell wall                                                                                                             | 7.0 × 7.6 µm, coccoid stage with no flagella                                                                                                         | sex not observed, forms flagellate stages                                                 | mero <sup>1</sup>                         |
| <i>Perkinsus marinus</i>                 | osmoheterotroph, obligate parasite                   | parasite of marine molluscs                                    | Yes                                                                                                                         | 2-10 µm; apicoplasts;                                                                                                                                | zoospores and trophozoites                                                                | Both as trophozoite and flagellated stage |
| <i>Oxyrrhis marina</i>                   | heterotrophic (phagotrophic; omnivorous)             | plankton; global coastally except polar; can form blooms       | naked (no theca) except has scales                                                                                          | 20-30 µm                                                                                                                                             |                                                                                           | yes                                       |
| <i>Hematodinium sp.</i>                  | parasite                                             | crustacean hemolymph                                           | naked at trophont stage                                                                                                     | Cultured as asexual multinucleated trophonts (up to 50 µm)                                                                                           | Complex asexual stages, non-flagellate; mononucleated sexual zoospores                    | Only at zoospore stage                    |
| <i>Fugacium (Symbiodinium) kawagutii</i> | photoautotrophic symbionts (maybe some phagotrophy?) | intra- or intercellular symbionts of marine invertebrates      | naked swimming cell but cellulose wall in nonmotile phase                                                                   | ~10 µm                                                                                                                                               | motile (free-swimming) and non-motile (in host) phases; only the latter grows and divides |                                           |
| <i>Alexandrium catenella</i>             | photoautotroph                                       | HAB-forming phytoplankton; produce saxitoxin (PSP)             | cellulose plates                                                                                                            | ~25 µm, usually chains of 2, 4, 8                                                                                                                    | asexual reproduction by binary fission; sexual reproduction to form a cyst                | yes                                       |

|                                                                      |                                                                            |                                                                                          |                                                                                                                     |                                                                                                                                                                                                                        |                                                                                                                       |                                                                       |
|----------------------------------------------------------------------|----------------------------------------------------------------------------|------------------------------------------------------------------------------------------|---------------------------------------------------------------------------------------------------------------------|------------------------------------------------------------------------------------------------------------------------------------------------------------------------------------------------------------------------|-----------------------------------------------------------------------------------------------------------------------|-----------------------------------------------------------------------|
| <i>Breviolum (Symbiodinium) sp.</i>                                  | photoautotrophic symbionts (maybe some phagotrophy?)                       | intra- or intercellular symbionts of marine invertebrates                                | naked swimming cell but cellulose wall in nonmotile phase                                                           | ~10 µm                                                                                                                                                                                                                 | motile (free-swimming) and non-motile (in host) phases; only the latter grows and divides                             |                                                                       |
| <i>Crypthecodinium cohnii</i>                                        | heterotrophic (glucose, acetate, propionic acid); may predate via peduncle | brackish, littoral, neritic; often around macrophytes like Fucus. temperate and tropical | very thin cellulose                                                                                                 | ~15-20 µm; produce carotenoids in the light                                                                                                                                                                            | stores starch during log phase, DHA mainly in cysts?; swimming cells and cysts.                                       |                                                                       |
| <i>Amphidinium carterae</i>                                          | photoautotroph                                                             | HAB-forming phytoplankton                                                                | naked?                                                                                                              | ~25 µm, solitary                                                                                                                                                                                                       | Asexual by binary fission                                                                                             | yes                                                                   |
| <i>Karlodinium veneficum</i>                                         | mixotroph (predatory)                                                      | HAB-forming, toxic, marine, planktonic                                                   | naked                                                                                                               | ~10 µm                                                                                                                                                                                                                 |                                                                                                                       | yes                                                                   |
| <b>Discobans</b>                                                     |                                                                            |                                                                                          |                                                                                                                     |                                                                                                                                                                                                                        |                                                                                                                       |                                                                       |
| <i>Bodo saltans</i>                                                  | phagoheterotrophic                                                         | broadly distributed                                                                      | none?                                                                                                               | saltans is 4-5 µm with two flagellae                                                                                                                                                                                   |                                                                                                                       | no? saltans attaches to surfaces by tip of long (posterior) flagellum |
| <i>Diplonema papillatum</i>                                          | phagoheterotrophic                                                         | free-living planktonic?                                                                  | no pellica                                                                                                          | ~16 µm, two flagella of equal length, two subapical openings                                                                                                                                                           |                                                                                                                       | yes                                                                   |
| <i>Eutreptiella gymnastica</i>                                       | Photoautotrophic                                                           | neritic, cosmopolitan                                                                    | flexible pellicle                                                                                                   | 15-20 µm, two flagella, reddish eyespot, paramylon granules in cytoplasm, vigorous metaboly often observed                                                                                                             | can form a cyst with layered cell wall                                                                                | yes                                                                   |
| <i>Naegleria gruberi</i>                                             | phagoheterotrophic                                                         | wet soil and freshwater                                                                  | naked                                                                                                               | amoeboflagellate; the amoeba lacks microtubule cytoskeleton, flagellate has elaborate one including the flagella; de novo synthesis of basal body durin transformation from former to latter;                          | apparently the genome revealed two distinct haplotypes                                                                |                                                                       |
| <b>Opisthokonts</b>                                                  |                                                                            |                                                                                          |                                                                                                                     |                                                                                                                                                                                                                        |                                                                                                                       |                                                                       |
| <i>Pirum gemmata</i> ATCC PRA-279? 96% identical to <i>Abeoforma</i> | osmoheterotroph; stores glycogen                                           | peanut worm ( <i>Phascolosoma agassizii</i> ) gut contents, BC, 2004                     | composition unknown but fibrous and woven; contain membrane-bound tubular extensions of the cytoplasm with tubules. | vegetative cells ~50-150 µm; large central vacuole with cytoplasm mostly pressed against periphery; multinucleate with nuclei 2 to 4 µm; sporulation happens in half an hour!; endospores ~5 µm and 'weakly amoeboid'. | walled cells divide internally to produce lots of endospores, which are released through parental cell wall in spurts | no                                                                    |

|                                                                          |                                  |                                                       |                                                                                                                                                                                              |                                                                                                                                                                                                                |                                                                                                                                                                                                                        |     |
|--------------------------------------------------------------------------|----------------------------------|-------------------------------------------------------|----------------------------------------------------------------------------------------------------------------------------------------------------------------------------------------------|----------------------------------------------------------------------------------------------------------------------------------------------------------------------------------------------------------------|------------------------------------------------------------------------------------------------------------------------------------------------------------------------------------------------------------------------|-----|
| <i>Sphaeroforma arctica</i>                                              | phagoheterotrophic               | invertebrate symbiont; isolated from Gammarus; arctic | carbohydrate, mostly N-acetylglucosamine (chitin?)                                                                                                                                           | simple round cells, lots of DHA and EPA in cell membranes but not accumulated to high levels in lipid bodies                                                                                                   | very simple growth from 5-7 µm cells for 48 hr to 35-40 µm, then releasing ~120 new cells                                                                                                                              | no  |
| <i>Abeoforma whisleri</i><br>ATCC PRA-280? 96% identical to <i>Pirum</i> | osmoheterotroph; stores glycogen | mussel ( <i>Mytilus</i> sp.) gut contents, BC, 2007   | have both cell wall and extracellular matrix; wall sometimes very thick; composition unknown but fibrous and woven; contain membrane-bound tubular extensions of the cytoplasm with tubules. | vegetative cells mostly spherical ~50 µm but some plasmodial; endospores, plasmodia, and hyphae-like structures observed; say dispersal amoebae 'function in post reproductive dispersal' and are uninucleate. | walled spherical cells, plasmodia, amoebae; asexual reproduction by dispersal amoebae, endospores, binary fission and budding.                                                                                         | no  |
| <i>Salpingoeca rosetta</i>                                               | phagoheterotrophic               | free-living planktonic and benthic thecate            | a proteinaceous and polysaccharide matrix                                                                                                                                                    | cell body 3-10 µm; single apical flagellum surrounded by a collar of 30-40 actin-filled microvilli                                                                                                             | asexual by longitudinal fission; sexual reproduction triggered by nutrient deprivation and a secreted chondroitin lyase from <i>Vibrio</i> bacteria; dynamic life history includes unicellular and multicellular forms | yes |

<sup>1</sup> Meroplanktonic organisms spend only a portion of their lives as plankton.

## References for Suppl. Table 2:

- Worden, A. Z., Nolan, J. K., & Palenik, B. (2004). Assessing the dynamics and ecology of marine picophytoplankton: the importance of the eukaryotic component. *Limnology and Oceanography* **49**, 168–179.
- Limardo AJ, Sudek S, Choi CJ, Poirier C, Rii YM, Blum M, Roth R, Goodenough U, Church MJ & AZ Worden. (2017) Quantitative biogeography of picoprasinophytes establishes differential ecotype distributions and significant contributions to marine phytoplankton. *Environmental Microbiology* **19**, 3219-3234.
- Suda S, Atsumi M, & Miyashita H. (2002). Taxonomic characterization of a marine *Nannochloropsis* species, *N. oceanica* sp. nov. (Eustigmatophyceae). *Phycologia*, **41**, 273-279.
- Scholz MJ, Weiss TL, Jinkerson RE, Jing J, Roth R, Goodenough U, Posewitz MC & Gerken HG. (2014). Ultrastructure and composition of the *Nannochloropsis gaditana* cell wall. *Eukaryotic cell*, **13**, 1450-1464.

Pan K, Qin J, Li S, Dai W, Zhu B, Jin Y, Yu W, Yang G. & Li D. (2011). Nuclear monoploidy and asexual propagation of *Nannochloropsis oceanica* (eustigmatophyceae) as revealed by its genome sequence<sup>1</sup>. *Journal of phycology*, **47**, 1425-1432.

| Suppl. Table 3                                 | 5-Fluorouracil | Amphotericin B | Ampicillin | Atrazine | Basta | Benomyl | Blasticidin | Carboxine | Chloramphenicol | Cycloheximide | Formaldehyde | Geneticin (G418) | Glufosinate | Glyphosate | Hygromycin B | Kanamycin | Neomycin | Nourseothricin | Paromomycin | Penicillin | Phleomycin | Phleomycin | Puromycin | Rifampicin | Streptomycin | Tetracycline | Zeocin   |
|------------------------------------------------|----------------|----------------|------------|----------|-------|---------|-------------|-----------|-----------------|---------------|--------------|------------------|-------------|------------|--------------|-----------|----------|----------------|-------------|------------|------------|------------|-----------|------------|--------------|--------------|----------|
| <i>Abeoforma whisleri</i>                      | n/s            |                |            |          |       | 1-20    |             | 20-300    |                 |               |              |                  |             |            |              |           |          |                |             |            |            |            | 100-500   |            |              |              |          |
| <i>Alexandrium catenella</i>                   |                | n/s            | n/s        |          | 60    |         | 25          |           | 20              |               | 20           | n/s              |             |            | n/s          | n/s       |          |                |             |            |            |            |           | 200        | n/s          |              |          |
| <i>Amorphochlora amoebiformis</i> (CCMP2058)   |                |                |            |          |       |         |             |           |                 | 10            |              |                  |             |            |              |           |          |                |             |            |            |            |           |            |              |              | 300      |
| <i>Amphidinium carterae</i>                    |                |                |            | 2.5      |       |         |             |           |                 |               |              |                  |             |            |              |           |          |                |             |            |            |            |           |            |              |              |          |
| <i>Aurantiochytrium limacinum</i>              |                |                | n/s        |          |       |         |             |           |                 |               |              | 500              |             |            | 200          |           |          |                |             |            |            |            |           |            |              | n/s          | 100      |
| <i>Bathycoccus prasinos</i> (RCC4222)          |                |                |            |          |       |         |             |           |                 |               |              | 1000             |             |            |              |           |          |                |             |            |            |            |           |            |              |              |          |
| <i>Bigelowiella natans</i>                     |                |                |            |          |       |         |             |           |                 |               |              | 400              |             |            |              |           |          |                |             |            |            |            |           |            |              |              |          |
| <i>Bodo saltans</i>                            |                |                |            |          |       |         |             |           |                 |               |              | 5                |             |            |              |           |          |                |             |            |            |            |           |            |              |              |          |
| <i>Breviolum (Symbiodinium) sp.</i>            | 200            |                |            |          |       |         |             |           |                 |               |              |                  |             |            |              |           |          |                |             |            |            |            |           |            |              |              |          |
| <i>Cryptothecodinium cohnii</i> (CCMP316)      |                |                |            |          |       |         | 50          |           | 100-400         |               |              | 100-800          |             |            |              |           |          |                |             |            |            |            |           |            |              |              |          |
| <i>Diplonema papillatum</i>                    |                |                |            |          |       |         | 50          |           |                 |               |              | 75               |             |            | 125          |           |          |                |             |            |            | 500        | 20        |            |              | n/s          |          |
| <i>Emiliana huxleyi</i>                        |                |                |            |          |       |         |             |           |                 |               |              | 250              |             |            |              |           |          | 50             |             |            |            |            |           |            |              |              |          |
| <i>Euplotes crassus</i> and <i>E. focardii</i> |                |                |            |          |       |         |             |           |                 |               |              | 200              |             |            |              |           |          |                | 200         |            |            |            | 40        |            |              |              |          |
| <i>Eutreptiella gymnastica</i>                 |                |                |            |          |       |         | 10          |           |                 |               |              | 200              |             |            | 200          |           |          |                |             |            |            |            | 10        |            |              |              | 200      |
| <i>Fragilariopsis cylindrus</i>                |                |                |            |          |       |         |             |           |                 |               |              | 200              |             |            |              |           |          |                |             |            |            |            |           |            |              |              | 100      |
| <i>Heterosigma akashiwo</i>                    |                |                |            |          |       |         |             |           |                 |               |              | 175              |             |            | 10           |           |          |                |             |            |            | 0.05       |           |            |              |              | 0.5      |
| <i>Isochrysis galbana</i>                      |                |                |            |          |       |         |             |           |                 |               |              | 175              |             |            |              |           |          | 150            |             |            |            |            |           |            |              |              | 250      |
| <i>Karlodinium veneficum</i>                   |                | n/s            | n/s        |          | 100   |         | 30          |           | 10              |               | 20           | n/s              |             |            | n/s          | 100       |          |                | n/s         |            |            |            |           | 300        | 500          |              |          |
| <i>Micromonas commoda</i> (CCMP2709)           |                |                |            |          |       |         |             |           | 2               | 0.001         |              |                  |             |            |              |           |          |                |             |            |            |            |           |            |              |              |          |
| <i>Micromonas pusilla</i> (CCMP1545)           |                |                |            |          |       |         |             |           | 3               | 0.001         |              |                  |             |            |              |           |          |                |             |            |            |            |           |            |              |              |          |
| <i>Naegleria gruberi</i>                       |                |                |            |          |       |         |             |           |                 |               |              |                  |             |            | 300          |           | 700      |                |             |            | 1500       |            |           |            |              |              |          |
| <i>Ostreococcus lucimarinus</i> (RCC802)       |                |                |            |          |       |         |             |           |                 |               |              | 1000             |             |            |              |           |          |                | n/s         |            |            | 2.5        |           |            |              |              |          |
| <i>Oxyrrhis marina</i>                         |                | n/s            | n/s        |          | n/s   |         | n/s         |           | 50              |               | 40           | n/s              |             |            | n/s          | n/s       |          |                | n/s         | n/s        |            |            | 1         | 225        | n/s          |              |          |
| <i>Phaeodactylum tricomutum</i>                |                |                |            |          |       |         |             |           |                 |               |              |                  |             |            |              |           |          | 200            |             |            |            | 20         |           |            |              |              | 50       |
| <i>Perkinsus marinus</i>                       |                |                |            |          |       |         | 50-200      |           |                 |               |              |                  |             |            |              |           |          |                |             |            |            |            | 10-50     |            |              |              | 50-200   |
| <i>Pirum gemmata</i>                           |                |                |            |          |       | 1-20    |             | 20-300    |                 |               |              |                  |             |            |              |           |          |                | n/s         |            |            | 10-300     | 100-500   |            |              |              |          |
| <i>Pseudo-nitzschia australis</i>              |                |                |            |          |       |         |             |           |                 | 3             |              |                  |             |            |              |           |          |                |             |            |            |            |           |            |              |              | 1        |
| <i>Pseudo-nitzschia multiseriis</i>            |                |                |            |          |       |         |             |           |                 | 3             |              |                  |             |            |              |           |          |                | 100         |            |            |            |           |            |              |              | 1        |
| <i>Pyramimonas parkeae</i>                     |                |                |            |          |       |         |             |           |                 |               |              | 400              |             |            |              |           |          |                |             |            |            |            |           |            |              |              | 100      |
| <i>Salpingoeca rosetta</i>                     |                |                |            |          |       |         |             |           |                 |               |              |                  |             |            |              |           |          |                |             |            |            |            | 40        |            |              |              |          |
| <i>Seminavis robusta</i>                       |                |                |            |          |       |         |             |           |                 |               |              |                  |             | 250        |              |           |          |                |             |            |            | 80         |           |            |              |              |          |
| <i>Sphaeroforma arctica</i>                    |                |                |            |          |       | 1-20    |             | 20-300    |                 |               |              |                  |             |            |              |           |          |                |             |            |            | 10         |           |            |              |              |          |
| <i>Tetraselmis striata</i>                     | n/s            |                |            |          |       |         |             |           |                 |               |              |                  |             |            |              |           |          |                |             |            |            | 10-300     | 100-500   |            |              |              | 150      |
| <i>Thalassiosira pseudonana</i> (CCMP1335)     |                |                |            |          |       |         |             |           |                 |               |              |                  | 150         |            |              |           |          |                |             |            |            |            |           |            |              |              |          |
|                                                |                |                |            |          |       |         |             |           |                 |               |              |                  |             |            |              |           |          |                |             |            |            |            |           |            |              |              | 100-200* |

1500 1000 500 100 50 1  
concentration (µg/mL)

\*we recommend 100 µg/mL in pour plates and 200 µg/mL in liquid medium



**Suppl. Table 4. Tested transformation techniques.**

A. Electroporation, B. Biolistics, C. Microinjection, D. Chemical transformation, E. Conjugation and F. Glass beads abrasion conditions. Clades of the species are following the order from Fig. 1.

**A.** Used electroporation machines, programs and survival rate of cells after electroporation.

| Species                                                                          | Electroporation machine (type of transformation) | Used program/setting                                                                                | Survival rate |
|----------------------------------------------------------------------------------|--------------------------------------------------|-----------------------------------------------------------------------------------------------------|---------------|
| <b>Archaeplastids</b>                                                            |                                                  |                                                                                                     |               |
| <i>Ostreococcus lucimarinus</i> (RCC802)                                         | Gene Pulser Xcell                                | 1200V, 25 $\mu$ F                                                                                   | 30-50%        |
| <i>Bathycoccus prasinus</i> (RCC4222)                                            | Gene Pulser Xcell                                | 1500V, 25 $\mu$ F                                                                                   | 50%           |
| <i>Micromonas commoda</i> (CCMP2709, genome sequenced, axenic version of RCC299) | LONZA®                                           | SF Buffer with pulse EH-100, EO-100, EN-138 and EW-113                                              | 10-11%        |
| <i>Micromonas pusilla</i> (CCMP1545)                                             | BioRad Gene Pulser                               | 1000V, 10 $\mu$ F, 400 $\Omega$<br>800V, 25 $\mu$ F, 400 $\Omega$<br>600V, 50 $\mu$ F, 400 $\Omega$ | n/a           |
| <i>Pyramimonas parkeae</i>                                                       | Gene Pulser Xcell                                | 1500V, 25 $\mu$ F                                                                                   | n/a           |
|                                                                                  | Gene Pulser Xcell                                | 300V, 500 $\mu$ F                                                                                   | n/a           |
|                                                                                  | Gene Pulser Xcell                                | 2500V, 25 $\mu$ F                                                                                   | n/a           |
|                                                                                  | Gene Pulser Xcell                                | 310V, 960 $\mu$ F                                                                                   | n/a           |
|                                                                                  | Gene Pulser Xcell                                | 420V, 960 $\mu$ F                                                                                   | n/a           |
|                                                                                  | Gene Pulser Xcell                                | 300V, 200 $\mu$ F                                                                                   | n/a           |
|                                                                                  | Gene Pulser Xcell                                | 100V, 100 $\mu$ F                                                                                   | n/a           |
|                                                                                  | Gene Pulser Xcell                                | 100V, 300 $\mu$ F                                                                                   | n/a           |
|                                                                                  | Amaxa Nucleofector II                            | preset program X-001                                                                                | n/a           |
|                                                                                  | Amaxa Nucleofector II                            | preset program T-020                                                                                | n/a           |
|                                                                                  | Amaxa Nucleofector II                            | preset program T-023                                                                                | n/a           |
|                                                                                  | Amaxa Nucleofector II                            | preset program U-035                                                                                | n/a           |
| <b>Rhizarians (Chlorarachniophytes)</b>                                          |                                                  |                                                                                                     |               |
| <i>Amorphochlora</i> ( <i>Lotharella</i> ) <i>amoebiformis</i> (CCMP2058)        | Gene Pulser Xcell                                | 120 V, 25 ms square wave, 0.2 cm cuvette                                                            | 20-30%        |
| <i>Bigelowiella natans</i>                                                       | Amaxa Nucleofector II                            | preset program X-001                                                                                | n/a           |
|                                                                                  | Amaxa Nucleofector II                            | preset program T-020                                                                                | n/a           |
|                                                                                  | Amaxa Nucleofector II                            | preset program T-023                                                                                | n/a           |
|                                                                                  | Amaxa Nucleofector II                            | preset program U-035                                                                                | n/a           |

|                                                                 |                       |                                                                                                                                                                                         |        |
|-----------------------------------------------------------------|-----------------------|-----------------------------------------------------------------------------------------------------------------------------------------------------------------------------------------|--------|
|                                                                 | Gene Pulser Xcell     | 7× poring pulse: 300V, 5ms; 5× transfer pulse: 10V, 50ms                                                                                                                                | n/a    |
|                                                                 | Gene Pulser Xcell     | 7× poring pulse: 250V, 5ms; 5× transfer pulse: 10V, 50ms                                                                                                                                | n/a    |
|                                                                 | Gene Pulser Xcell     | 7× poring pulse: 350V, 5ms; 5× transfer pulse: 10V, 50ms                                                                                                                                | n/a    |
| <b>Stramenopiles (Diatoms, Bacillariophytes, Raphidophytes)</b> |                       |                                                                                                                                                                                         |        |
| <i>Seminavis robusta</i>                                        |                       | Single pulse conditions: 5 V AC for 5 sec, 300 V pulse for 5, 2.5, 0.5, or 0.1 msec.                                                                                                    |        |
|                                                                 | BTX ECM 2001          | 5 pulse conditions: 5 V AC for 5 sec, 300 V pulse for 5, 2, 1, or 0.1 msec                                                                                                              | n/a    |
|                                                                 |                       | 10 pulse conditions: 5 V AC for 5 sec, 300 or 500 V pulse for 0.1 or 0.05 msec (only for 500 V)                                                                                         |        |
|                                                                 | NEPA21                | Poring pulse: 150, 200, 225, 250, 275, or 300 V, 10% decay rate; 5 ms length, 50 ms interval<br>Transfer pulse: 8 V, 40% decay rate, 50 ms length, 50 ms interval, alternating polarity | n/a    |
| <i>Heterosigma akashiwo</i>                                     | Gene Pulser Xcell     | 50/75 V, 25 µF and ∞Ω                                                                                                                                                                   | 80%    |
| <i>Aurantiochytrium limacinum</i>                               | Gene Pulser (BIO-RAD) | 2 pulses: 450V, 25 µF, 1000 Ω (~5 ms)                                                                                                                                                   | 2.6%   |
|                                                                 | NEPA                  | 2 pulses: 250 V, 4 ms                                                                                                                                                                   | 1.55%  |
|                                                                 | NEPA                  | 2 pulses: 275 V, 8 ms                                                                                                                                                                   | 8.2%   |
|                                                                 | NEPA                  | 2 pulses: 300 V, 12 ms                                                                                                                                                                  | 4.7%   |
| <i>Nannochloropsis oceanica</i>                                 | Gene Pulser II        | 1800V, 50 µF, 20 ms                                                                                                                                                                     | n/a    |
|                                                                 | Gene Pulser II        | 1000V, 50 µF, 20 ms                                                                                                                                                                     | n/a    |
| <b>Alveolates</b>                                               |                       |                                                                                                                                                                                         |        |
| <i>Euplotes crassus</i>                                         | BioRad Gene Pulser    | 200V, 25µF, 100Ω                                                                                                                                                                        | 50-60% |
| <i>Chromera velia</i>                                           | Amaxa Nucleofector II | preset programs X-001                                                                                                                                                                   | n/a    |
|                                                                 | Amaxa Nucleofector II | preset program T-020                                                                                                                                                                    | n/a    |
|                                                                 | Amaxa Nucleofector II | preset program T-023                                                                                                                                                                    | n/a    |
|                                                                 | Gene Pulser Xcell     | 1500V, 25µF                                                                                                                                                                             | n/a    |
|                                                                 | Gene Pulser Xcell     | 300V, 500µF                                                                                                                                                                             | n/a    |
|                                                                 | Gene Pulser Xcell     | 2500V, 25µF                                                                                                                                                                             | n/a    |
|                                                                 | Gene Pulser Xcell     | 310V, 960µF                                                                                                                                                                             | n/a    |
| <i>Perkinsus marinus</i>                                        | Amaxa Nucleofector II | preset program D-023                                                                                                                                                                    | n/a    |
| <i>Oxyrrhis marina</i>                                          | BioRad's MicroPulser  | DIC                                                                                                                                                                                     | n/a    |
|                                                                 | BioRad's MicroPulser  | DIC -2 shocks                                                                                                                                                                           | n/a    |
|                                                                 | BioRad's MicroPulser  | SHS                                                                                                                                                                                     | n/a    |

|                                                    |                                               |                                                      |     |
|----------------------------------------------------|-----------------------------------------------|------------------------------------------------------|-----|
|                                                    | BioRad's MicroPulser                          | SC2                                                  | n/a |
| <i>Hematodinium</i><br>sp.                         | Amaxa Nucleofector II                         | D-023 and X-001                                      | <1% |
| <i>Fugacium</i><br><i>kawagutii</i>                | BioRad's MicroPulser                          | DIC                                                  | n/a |
|                                                    | BioRad's MicroPulser                          | DIC -2 shocks                                        | n/a |
|                                                    | BioRad's MicroPulser                          | SHS                                                  | n/a |
|                                                    | BioRad's MicroPulser                          | SC2                                                  | n/a |
| <i>Alexandrium</i><br><i>catenella</i>             | BioRad's MicroPulser                          | DIC                                                  | n/a |
|                                                    | BioRad's MicroPulser                          | DIC -2 shocks                                        | n/a |
|                                                    | BioRad's MicroPulser                          | SHS                                                  | n/a |
|                                                    | BioRad's MicroPulser                          | SC2                                                  | n/a |
| <i>Breviolum</i><br>( <i>Symbiodinium</i> )<br>sp. | NePA21 Electro-kinetic<br>transfection system | Poring pulse: 300V, 10ms<br>Transfer pulse: 8V, 50ms | n/a |
| <i>Cryptothecodinium</i><br><i>cohnii</i>          | Amaxa Nucleofector II                         | preset program D-023                                 | 79% |
|                                                    | Amaxa Nucleofector II                         | preset program A-020                                 | 85% |
|                                                    | Amaxa Nucleofector II                         | preset program T-020                                 | 67% |
|                                                    | Amaxa Nucleofector II                         | preset program T-030                                 | 53% |
|                                                    | Amaxa Nucleofector II                         | preset program X-001                                 | 62% |
|                                                    | Amaxa Nucleofector II                         | preset program X-001                                 | 71% |
|                                                    | Amaxa Nucleofector II                         | preset program L-029                                 | 77% |
|                                                    | Amaxa Nucleofector II                         | preset program X-003                                 | n/a |
|                                                    | Amaxa Nucleofector II                         | preset program X-005                                 | n/a |
|                                                    | Amaxa Nucleofector II                         | preset program X-033                                 | n/a |
|                                                    | Amaxa Nucleofector II                         | preset program Y-003                                 | n/a |
|                                                    | Amaxa Nucleofector II                         | preset program Y-005                                 | n/a |
|                                                    | Amaxa Nucleofector II                         | preset program Y-033                                 | n/a |
|                                                    | Amaxa Nucleofector II                         | preset program Z-007                                 | n/a |
|                                                    | Amaxa Nucleofector II                         | preset program Z-023                                 | n/a |
|                                                    | Amaxa Nucleofector II                         | preset program Z032                                  | n/a |
|                                                    | Amaxa Nucleofector II                         | preset program BAC1                                  | n/a |
|                                                    | Amaxa Nucleofector II                         | preset program BAC2                                  | n/a |
|                                                    | Amaxa Nucleofector II                         | preset program BAC3                                  | n/a |
|                                                    | Amaxa Nucleofector II                         | preset program BAC4                                  | n/a |
|                                                    | Amaxa Nucleofector II                         | preset program BAC5                                  | n/a |
|                                                    | Amaxa Nucleofector II                         | preset program BAC6                                  | n/a |
|                                                    | Amaxa Nucleofector II                         | preset program BAC7                                  | n/a |
|                                                    | Amaxa Nucleofector II                         | preset program L-029                                 | n/a |
|                                                    | Amaxa Nucleofector II                         | preset program L-029                                 | n/a |
|                                                    | Microfluidics                                 | Straight 313 V                                       | n/a |
| Microfluidics                                      | Straight 625 V                                | n/a                                                  |     |
| Microfluidics                                      | Straight 938 V                                | n/a                                                  |     |
| Microfluidics                                      | Straight 1250V                                | n/a                                                  |     |

|                              |                       |                                                                                                                          |         |
|------------------------------|-----------------------|--------------------------------------------------------------------------------------------------------------------------|---------|
|                              | Microfluidics         | Straight 1563 V                                                                                                          | n/a     |
|                              | Microfluidics         | Divergent 333 V                                                                                                          | n/a     |
|                              | Microfluidics         | Divergent 667 V                                                                                                          | n/a     |
|                              | Microfluidics         | Divergent 1000 V                                                                                                         | n/a     |
|                              | Microfluidics         | Divergent 1333 V                                                                                                         | n/a     |
|                              | Microfluidics         | Divergent 1667 V                                                                                                         | n/a     |
|                              | Microfluidics         | Divergent 5000 V                                                                                                         | n/a     |
|                              | Lipofectamine         |                                                                                                                          | 90-100% |
| <i>Amphidinium carterae</i>  | Amaxa Nucleofector 4D | X-100, D-023, L-029 and EH 100.                                                                                          | n/a     |
|                              | NEPA electroporator   | Poring pulse: 150V, length: 5 ms, interval 50 ms, number 7<br>Transfer pulse: 8V, length 50 ms, interval 50 ms, number 5 | n/a     |
|                              | NEPA electroporator   | Poring pulse: 200V, length: 5 ms, interval 50 ms, number 7<br>Transfer pulse: 8V, length 50 ms, interval 50 ms, number 5 | n/a     |
|                              | NEPA electroporator   | Poring pulse: 225V, length: 5 ms, interval 50 ms, number 7<br>Transfer pulse: 8V, length 50 ms, interval 50 ms, number 5 | n/a     |
|                              | NEPA electroporator   | Poring pulse: 250V, length: 5 ms, interval 50 ms, number 7<br>Transfer pulse: 8V, length 50 ms, interval 50 ms, number 5 | n/a     |
|                              | NEPA electroporator   | Poring pulse: 275V, length: 5 ms, interval 50 ms, number 7<br>Transfer pulse: 8V, length 50 ms, interval 50 ms, number 5 | n/a     |
|                              | NEPA electroporator   | Poring pulse: 300V, length: 5 ms, interval 50 ms, number 1<br>Transfer pulse: 8V, length 50 ms, interval 50 ms, number 5 | n/a     |
|                              | NEPA electroporator   | Poring pulse: 300V, length: 5 ms, interval 50 ms, number 4<br>Transfer pulse: 8V, length 50 ms, interval 50 ms, number 5 | n/a     |
|                              | NEPA electroporator   | Poring pulse: 300V, length: 5 ms, interval 50 ms, number 7<br>Transfer pulse: 8V, length 50 ms, interval 50 ms, number 5 | n/a     |
|                              | NEPA electroporator   | Poring pulse: 300V, length: 5 ms, interval 50 ms, number 9<br>Transfer pulse: 8V, length 50 ms, interval 50 ms, number 5 | n/a     |
| <i>Karlodinium veneficum</i> | BioRad's MicroPulser  | DIC                                                                                                                      | n/a     |
|                              | BioRad's MicroPulser  | DIC -2 shocks                                                                                                            | n/a     |
|                              | BioRad's MicroPulser  | SHS                                                                                                                      | n/a     |
|                              | BioRad's MicroPulser  | SC2                                                                                                                      | n/a     |

| <b>Discobans (Euglenozoans and Heteroloboseans)</b> |                                            |                                                          |                       |
|-----------------------------------------------------|--------------------------------------------|----------------------------------------------------------|-----------------------|
| <i>Bodo saltans</i>                                 | NePA21 Electro-kinetic transfection system | Poring pulse: 250V, 25ms<br>Transfer pulse: 60V, 99ms    | 30-50%                |
| <i>Diplonema papillatum</i>                         | BTX                                        | 1600V, 25W, 50mF                                         | 10 %                  |
|                                                     | Amaxa Nucleofector II                      | preset program X-001                                     | 80-90 %               |
|                                                     | Amaxa Nucleofector II                      | preset program X-014                                     | 40-50 %               |
| <i>Eutreptiella gymnastica</i>                      | Gene Pulser Xcell                          | 1500V, 25µF                                              | n/a                   |
|                                                     | Gene Pulser Xcell                          | 300V, 500µF                                              | n/a                   |
|                                                     | Gene Pulser Xcell                          | 2500V, 25µF                                              | n/a                   |
|                                                     | Gene Pulser Xcell                          | 310V, 960µF                                              | n/a                   |
|                                                     | Gene Pulser Xcell                          | 420V, 960µF                                              | n/a                   |
|                                                     | Gene Pulser Xcell                          | 300V, 200µF                                              | n/a                   |
|                                                     | Gene Pulser Xcell                          | 100V, 100µF                                              | n/a                   |
|                                                     | Gene Pulser Xcell                          | 100V, 300µF                                              | n/a                   |
|                                                     | Gene Pulser Xcell                          | 200V, 100µF                                              | n/a                   |
|                                                     | Gene Pulser Xcell                          | 200V, 300µF                                              | n/a                   |
|                                                     | Gene Pulser Xcell                          | 350V, 1000µF                                             | n/a                   |
|                                                     | Gene Pulser Xcell                          | 7× poring pulse: 300V, 5ms; 5× transfer pulse: 10V, 50ms | n/a                   |
|                                                     | Gene Pulser Xcell                          | 7× poring pulse: 250V, 5ms; 5× transfer pulse: 10V, 50ms | n/a                   |
|                                                     | Amaxa Nucleofector II                      | preset program X-001                                     | n/a                   |
|                                                     | Amaxa Nucleofector II                      | preset program T-020                                     | n/a                   |
|                                                     | Amaxa Nucleofector II                      | preset program T-023                                     | n/a                   |
|                                                     | <i>Naegleria gruberi</i>                   | BioRad Gene Pulser xCell                                 | 175V, 500µF, 400Ω     |
| Amaxa Nucleofector II                               |                                            | preset program X-29                                      | 40-50%                |
| <b>Opisthokonts</b>                                 |                                            |                                                          |                       |
| <i>Sphaeroforma arctica</i>                         | Neon                                       | 1000-2500V, 10-40 ms, 1-3 pulses                         | n/a (not successful)  |
|                                                     | Lipofectamina                              |                                                          | n/a (not successful)  |
|                                                     | LONZA®                                     | 16 preset codes P3/P4/P5 buffer                          | n/a (not successful)  |
| <i>Abeoforma whisleri</i>                           | Neon (invitrogen)                          | 1300V, 25ms, pulse                                       | 60%                   |
|                                                     | LONZA®                                     | preset program EN-138 P3 buffer                          | 70%                   |
|                                                     | CaCl+Glycerol                              |                                                          | n/a (not successful)  |
|                                                     | Lipofectamine                              |                                                          | 100% (not successful) |
| <i>Salpingoeca rosetta</i>                          | LONZA®                                     | SF Buffer with pulse CM156                               | 50%                   |

## B. Used biolistic programs.

| Species | Biolistic machine | Used setting | Survival rate |
|---------|-------------------|--------------|---------------|
|---------|-------------------|--------------|---------------|

| <b>Archaeplastids</b>                                           |                                                        |                                                                                                                                              |        |
|-----------------------------------------------------------------|--------------------------------------------------------|----------------------------------------------------------------------------------------------------------------------------------------------|--------|
| <i>Tetraselmis striata</i>                                      | Bio-Rad Biolistic PDS-1000/He Particle Delivery System | 0.6µm AuNPs, rupture disc 1550 or 2000 psi, 6cm gap                                                                                          | n/a    |
| <i>Pyramimonas parkeae</i>                                      | PDS-1000/He                                            | 0.6 or 1µm AuNPs, rupture disc 1350 psi, 6cm gap                                                                                             | n/a    |
| <b>Haptophytes</b>                                              |                                                        |                                                                                                                                              |        |
| <i>Isochrysis galbana</i>                                       | PDS-1000/He                                            | 0.7µm Tungsten beads rupture disc 1350 psi, 6cm gap                                                                                          | n/a    |
| <b>Rhizarians (Chlorarachniophytes)</b>                         |                                                        |                                                                                                                                              |        |
| <i>Amorphochlora (Lotharella) amoebiformis</i>                  | PDS-1000/He                                            | 1 µm AuNPs, rupture disc 450 psi, 4cm gap                                                                                                    | n/a    |
| <i>Bigelowiella natans</i>                                      | PDS-1000/He                                            | 0.6µm AuNPs, rupture disc 1350 psi, 6cm gap                                                                                                  | n/a    |
| <b>Stramenopiles (Diatoms, Bacillariophytes, Raphidophytes)</b> |                                                        |                                                                                                                                              |        |
| <i>Fragilariopsis cylindrus</i>                                 |                                                        |                                                                                                                                              |        |
| <i>Pseudo-nitzschia multiseriis</i>                             |                                                        |                                                                                                                                              |        |
| <i>Pseudo-nitzschia robusta</i>                                 |                                                        |                                                                                                                                              |        |
| <i>Seminavis robusta</i>                                        | PDS-1000/He                                            | 0.55 µm AuNPs or 1.1 µm WNPs, 1550 psi, 3 µg/mL DNA non-linearized and linearized (but not CIP-treated), at 3, 6, 9, and 12 cm gap distances | n/a    |
| <b>Alveolates</b>                                               |                                                        |                                                                                                                                              |        |
| <i>Euplotes crassus</i>                                         | Bio-Rad Biolistic PDS-1000/He Particle Delivery System | 0.6 µm or 1.6 µm AuNPs, rupture disc 1550 psi, helium pressure 1750 psi, vacuum 26 inches Hg, gap distance 3/8 inches, in 10 mM HEPES pH 7.4 | 80-90% |
| <i>Chromera velia</i>                                           | PDS-1000/He                                            | 0.6µm AuNPs, rupture disc 1350 psi, 6cm gap                                                                                                  | n/a    |
| <i>Hematodinium</i> sp.                                         | Bio-Rad Biolistic PDS-1000/He Particle Delivery System | rupture disc 1550 psi<br>550 nm diameter gold particles                                                                                      | 10%    |
| <i>Fugacium kawagutii*</i>                                      | Bio-Rad Biolistic PDS-1000/He Particle Delivery System | 0.7 or 1.1 µm Tungsten; rupture disc 450, 650, 900, 1100, 1350, 1550 psi; vacuum 28 inches Hg; 7.5cm gap                                     | n/a    |
| <i>Alexandrium* catenella</i>                                   | Bio-Rad Biolistic PDS-1000/He Particle Delivery System | 0.7 or 1.1 µm Tungsten; rupture disc 450, 650, 900, 1100, 1350, 1550 psi; vacuum 28 inches Hg; 7.5cm gap                                     | n/a    |

|                                         |                                                           |                                                            |        |
|-----------------------------------------|-----------------------------------------------------------|------------------------------------------------------------|--------|
| <i>Crypthecodinium<br/>m<br/>cohnii</i> | Bio-Rad Biolistic PDS-1000/He<br>Particle Delivery System | rupture disk 1550 psi<br>550 nm diameter gold<br>particles | 70-80% |
|-----------------------------------------|-----------------------------------------------------------|------------------------------------------------------------|--------|

|                           |                                |                                                         |      |
|---------------------------|--------------------------------|---------------------------------------------------------|------|
| <i>Amphidium carterae</i> | Bio-Rad Biolistics PDS-1000/He | rupture disk 1550 psi<br>550 nm diameter gold particles | n.d. |
|---------------------------|--------------------------------|---------------------------------------------------------|------|

#### Discobans (Euglenozoans and Heteroloboseans)

|                                    |             |                                                     |     |
|------------------------------------|-------------|-----------------------------------------------------|-----|
| <i>Eutreptiella<br/>gymnastica</i> | PDS-1000/He | 0.6 or 1µm AuNPs, rupture<br>disc 1350 psi, 6cm gap | n/a |
|------------------------------------|-------------|-----------------------------------------------------|-----|

\*This part of work was assisted by Kaidian Zhang from Xiamen University, China.

#### C. Used microinjection setting.

| Species                 | Microinjection machine   | Used setting                                             | Survival rate |
|-------------------------|--------------------------|----------------------------------------------------------|---------------|
| <b>Alveolates</b>       |                          |                                                          |               |
| <i>Euplotes crassus</i> | Eppendorf InjectMan NI 2 | With Eppendorf Femtotips<br>Microinjection Capillary Tip | 2-10%         |

#### D. Used chemical transformation reagents.

| Species                                             | Transfection reagent                                                                  | Used setting                                                                                  | Survival rate |
|-----------------------------------------------------|---------------------------------------------------------------------------------------|-----------------------------------------------------------------------------------------------|---------------|
| <b>Archaeplastids</b>                               |                                                                                       |                                                                                               |               |
| <i>Pyramimonas<br/>parkeae</i>                      | Lipofectamine® 3000<br>Transfection Reagent<br>(Invitrogen)                           | DNA-Lipofectamine<br>complex prepared<br>according to the supplier.                           | n/a           |
| <b>Rhizarians (Chlorarachniophytes)</b>             |                                                                                       |                                                                                               |               |
| <i>Bigelowiella<br/>natans</i>                      | Lipofectamine® 3000<br>Transfection Reagent<br>(Invitrogen)                           | DNA-Lipofectamine<br>complex prepared<br>according to the supplier.                           | n/a           |
| <b>Alveolates</b>                                   |                                                                                       |                                                                                               |               |
| <i>Euplotes crassus</i>                             | Lipofectamine® 2000 or<br>Lipofectamine® 3000<br>Transfection Reagent<br>(Invitrogen) | DNA-Lipofectamine<br>complex prepared<br>according to the supplier.                           | 100%          |
|                                                     | Effectene Transfection<br>Reagent (QIAGEN)                                            | DNA-Effectene complex<br>prepared according to the<br>supplier with a double<br>amount of DNA | 10-20%        |
|                                                     | FuGENE HD Transfection<br>Reagent (Promega)                                           | DNA-FuGENE complex<br>prepared according to the<br>supplier.                                  | 50-60%        |
| <b>Discobans (Euglenozoans and Heteroloboseans)</b> |                                                                                       |                                                                                               |               |
| <i>Eutreptiella<br/>gymnastica</i>                  | Lipofectamine® 3000<br>Transfection Reagent<br>(Invitrogen)                           | DNA-Lipofectamine<br>complex prepared<br>according to the supplier.                           | n/a           |

#### E. Used conjugation.

| Species                                                         | Coincubation (species co-incubated) | Survival rate | Efficiency |
|-----------------------------------------------------------------|-------------------------------------|---------------|------------|
| <b>Stramenopiles (Diatoms, Bacillariophytes, Raphidophytes)</b> |                                     |               |            |
| <i>Thalassiosira pseudonana</i>                                 | <i>E. coli</i> EPI300               | n/a           | ~10%       |
| <i>Heterosigma akashiwo</i>                                     | <i>Agrobacterium</i>                | 10-15%        | n/a        |
| <b>Alveolates</b>                                               |                                     |               |            |
| <i>Oxyrrhis marina</i>                                          | <i>E. coli</i>                      | 100%          | 1-5%       |
| <i>Karlodinium veneficum</i>                                    | <i>E. coli</i>                      | 100%          | n/a        |
| <i>Alexandrium catenella</i>                                    | <i>E. coli</i>                      | 100%          | n/a        |

#### F. Used glass beads abrasion.

| Species                                                         | Coincubation (species co-incubated) | Survival rate | Efficiency |
|-----------------------------------------------------------------|-------------------------------------|---------------|------------|
| <b>Stramenopiles (Diatoms, Bacillariophytes, Raphidophytes)</b> |                                     |               |            |
| <i>Heterosigma akashiwo</i>                                     | n/a                                 | 80%           | n/a        |
| <b>Alveolates</b>                                               |                                     |               |            |
| <i>Perkinsus marinus</i>                                        | n/a                                 | 80-90%        | 0.01%-1%   |
| <i>Hematodinium sp.</i>                                         | n/a                                 | 40-50%        | 0%         |
| <i>Amphidinium carterae</i>                                     | None                                | No data       | 0%         |
|                                                                 | Polyethylene glycol                 | No data       | 0%         |



**Suppl. Table 5: List of used organisms, including name and link to www.protocols.io webpage**

| Species                                        | PI                                          | Investigators                                                                | protocols.io links                                                   | Sequences submitted (Accession No.)                                                                              |
|------------------------------------------------|---------------------------------------------|------------------------------------------------------------------------------|----------------------------------------------------------------------|------------------------------------------------------------------------------------------------------------------|
| <b>Archaeplastids</b>                          |                                             |                                                                              |                                                                      |                                                                                                                  |
| <i>Ostreococcus lucimarinus</i>                | François-Yves Bouget                        | Jean-Claude Lozano<br>Valérie Vergé                                          | <a href="#">Link</a>                                                 | pHAPT:luc vector (Djouani-Tahri <i>et al.</i> , 2011) was used as a template for preparation of linear construct |
| <i>Bathycoccus prasinos</i>                    | François-Yves Bouget                        | Jean-Claude Lozano<br>Valérie Vergé                                          | <a href="#">Link</a><br><a href="#">Link</a><br><a href="#">Link</a> | pHAPT:luc vector (Djouani-Tahri <i>et al.</i> , 2011) was used as a template for preparation of linear construct |
| <i>Micromonas commoda</i>                      | Alexandra Z. Worden                         | Manuel Ares<br>Jian Guo<br>Lisa Sudek                                        | <a href="#">Pending</a>                                              |                                                                                                                  |
| <i>Micromonas pusilla</i>                      | François-Yves Bouget<br>Alexandra Z. Worden | Manuel Ares<br>Jian Guo<br>Jean-Claude Lozano<br>Lisa Sudek<br>Valérie Vergé | <a href="#">Link</a>                                                 |                                                                                                                  |
| <i>Tetraselmis striata</i>                     | Heriberto Cerutti<br>Thomas Clemente        | Patrick Beardslee<br>Fulei Luan<br>Xiaoxue Wen                               | <a href="#">Link</a>                                                 | GenBank (KY886895)                                                                                               |
| <i>Pyramimonas parkeae</i>                     | Vladimír Hampl                              | Natalia Ewa Janowicz<br>Anna M.G. Novák Vanclová                             | <a href="#">Link</a>                                                 |                                                                                                                  |
| <b>Haptophytes</b>                             |                                             |                                                                              |                                                                      |                                                                                                                  |
| <i>Isochrysis galbana</i>                      | Colin Brownlee                              | Cecilia Balestreri<br>Andrea Highfield<br>Rowena Stern<br>Glen Wheeler       | <a href="#">Link</a><br><a href="#">Link</a>                         | MK903009 (pIgNAT construct)<br>MK903010 (PCR product of transgene)                                               |
| <i>Emiliania huxleyi</i>                       | Colin Brownlee                              | Cecilia Balestreri<br>Andrea Highfield<br>Rowena Stern<br>Glen Wheeler       | <a href="#">Link</a><br><a href="#">Link</a>                         |                                                                                                                  |
| <b>Rhizarians</b>                              |                                             |                                                                              |                                                                      |                                                                                                                  |
| <i>Amorphochlora (Lotharella) amoebiformis</i> | Yoshihisa Hirakawa                          | Kodai Fukuda                                                                 | <a href="#">Link</a>                                                 |                                                                                                                  |
| <i>Bigelowiella natans</i>                     | Vladimír Hampl                              | Natalia Ewa Janowicz<br>Anna M.G. Novák Vanclová                             | <a href="#">Link</a>                                                 |                                                                                                                  |
| <b>Stramenopiles</b>                           |                                             |                                                                              |                                                                      |                                                                                                                  |
| <i>Fragilariopsis cylindrus</i>                | Thomas Mock                                 | Amanda Hopes                                                                 | <a href="#">Link</a>                                                 |                                                                                                                  |

|                                     |                                                           |                                                                                                                           |                                                                                              |                                              |
|-------------------------------------|-----------------------------------------------------------|---------------------------------------------------------------------------------------------------------------------------|----------------------------------------------------------------------------------------------|----------------------------------------------|
|                                     |                                                           | Nigel Belshaw<br>Reuben Gilbertson                                                                                        |                                                                                              |                                              |
| <i>Thalassiosira pseudonana</i>     | Christopher L. Dupont<br>Pamela Silver                    | Jernej Turnsek                                                                                                            | <a href="#">Link</a><br><a href="#">Link</a>                                                 |                                              |
| <i>Seminavis robusta</i>            | Aaron Turkewitz                                           | Luke Noble<br>Matthew Rockman<br>Lev Tsy-pin                                                                              | <a href="#">Link</a>                                                                         |                                              |
| <i>Pseudo-nitzschia multiseriis</i> | G. Jason Smith                                            | Deborah Robertson<br>April Woods                                                                                          | <a href="#">Link</a>                                                                         |                                              |
| <i>Pseudo-nitzschia australis</i>   | G. Jason Smith                                            | Deborah Robertson<br>April Woods                                                                                          | <a href="#">Link</a><br><a href="#">Link</a>                                                 |                                              |
| <i>Heterosigma akashiwo</i>         | Kathryn Coyne                                             | Pamela Green                                                                                                              | <a href="#">Link</a><br><a href="#">Link</a>                                                 |                                              |
| <i>Aurantiochytrium limacinum</i>   | Jackie Collier                                            | Joshua Rest<br>Mariana Rius                                                                                               | <a href="#">Link</a><br><a href="#">Link</a><br><a href="#">Link</a>                         |                                              |
| <i>Caecitellus sp.</i>              | Patrick Keeling                                           | Liz Cooney<br>Nicholas Irwin                                                                                              | <a href="#">Link</a>                                                                         |                                              |
| <i>Nannochloropsis oceanica</i>     | Peter von Dassow                                          | Fernan Federichi<br>Isaac Nuñez<br>Tamara Matute<br>Albane Ruaud                                                          | <a href="#">Link</a><br><a href="#">Link</a>                                                 |                                              |
| <i>Phaeodactylum tricornutum</i>    | Andrew E. Allen                                           | Mark Moosburner                                                                                                           | <a href="#">Link</a><br><a href="#">Link</a><br><a href="#">Link</a>                         |                                              |
| <b>Alveolates</b>                   |                                                           |                                                                                                                           |                                                                                              |                                              |
| <i>Euplotes crassus</i>             | Cristina Miceli                                           | Rachele Cesaroni<br>Lawrence A. Klobutcher<br>Mariusz Nowacki<br>Angela Piersanti<br>Sandra Pucciarelli<br>Estienne Swart | <a href="#">Link</a>                                                                         |                                              |
| <i>Euplotes focardii</i>            | Cristina Miceli                                           | Angela Piersanti<br>Sandra Pucciarelli                                                                                    | <a href="#">Link</a>                                                                         |                                              |
| <i>Chromera velia</i>               | Vladimír Hampl                                            | Natalia Ewa Janowicz<br>Anna M.G. Novák Vanclová                                                                          | <a href="#">Link</a>                                                                         |                                              |
| <i>Perkinsus marinus</i>            | José A. Fernández<br>Robledo<br>Senjie Lin<br>Ross Waller | Duncan B. Coles<br>Elin Einarsson<br>Nastasia J. Freyria<br>Sebastian Gornik<br>Imen Lassadi<br>Arnab Pain                | <a href="#">Link</a><br><a href="#">Link</a><br><a href="#">Link</a><br><a href="#">Link</a> | GenBank<br>(EF632302, EF632303, KX423758–60) |

|                                                     |                                                    |                                                                                                                                       |                                                                                                                      |                       |
|-----------------------------------------------------|----------------------------------------------------|---------------------------------------------------------------------------------------------------------------------------------------|----------------------------------------------------------------------------------------------------------------------|-----------------------|
| <i>Oxyrrhis marina</i>                              | Patrick Keeling<br>Claudio Slamovits<br>Senjie Lin | Elizabeth Cooney<br>Nicholas A. T. Irwin<br>Elisabeth Hehenberger<br>Yoshihisa Hirakawa<br>Brittany Sprecher<br>Lu Wang<br>Huan Zhang | <a href="#">Link</a><br><a href="#">Link</a><br><a href="#">Link</a><br><a href="#">Link</a><br><a href="#">Link</a> |                       |
| <i>Hematodinium</i> sp.                             | Ross Waller                                        | Sebastian Gornik<br>I lan Hu<br>Imen Lassadi<br>Amab Pain                                                                             |                                                                                                                      | Pending               |
| <i>Fugacium (Symbiodinium) kawagutii</i>            | Senjie Lin                                         | Brittany Sprecher<br>Lu Wang<br>Huan Zhang                                                                                            | <a href="#">Link</a>                                                                                                 |                       |
| <i>Alexandrium catenella</i>                        | Senjie Lin                                         | Brittany Sprecher<br>Lu Wang<br>Huan Zhang                                                                                            | <a href="#">Link</a><br><a href="#">Link</a>                                                                         |                       |
| <i>Karlodinium veneficum</i>                        | Senjie Lin                                         | Brittany Sprecher<br>Huan Zhang                                                                                                       | <a href="#">Link</a><br><a href="#">Link</a>                                                                         |                       |
| <i>Breviolum (Symbiodinium) sp.</i>                 | Jun Minagawa                                       | Yuu Ishii<br>Konomi Kamada<br>Shinichiro Maruyama                                                                                     | <a href="#">Link</a>                                                                                                 |                       |
| <i>Crypthecodinium cohnii</i>                       | José Fernández Robledo<br>Ross Waller              | Duncan B. Coles<br>Nastasia J. Freyria<br>Paulo A. García<br>Imen Lassadi                                                             | <a href="#">Link</a>                                                                                                 |                       |
| <i>Amphidinium carterae</i>                         | Christopher Howe                                   | Adrain Barbrook<br>Isabel Nimmo<br>Ellen Nisbet                                                                                       | <a href="#">Link</a>                                                                                                 |                       |
| <b>Discobans (Euglenozoans and Heteroloboseans)</b> |                                                    |                                                                                                                                       |                                                                                                                      |                       |
| <i>Bodo saltans</i>                                 | Virginia Edgcomb                                   | Miguel A. Chiurillo<br>Roberto Decampo<br>Fatma Gomaa<br>Noelia Lander<br>Zhuhong Li                                                  | <a href="#">Link</a><br><a href="#">Link</a><br><a href="#">Link</a><br><a href="#">Link</a><br><a href="#">Link</a> |                       |
| <i>Diplonema papillatum</i>                         | Julius Lukeš                                       | Drahomíra Faktorová<br>Ambar Kachale<br>Binnypreet Kaur<br>Getraud Burger<br>Matus Valach                                             | <a href="#">Link</a>                                                                                                 | GenBank<br>(MN047315) |
| <i>Eutreptiella gymnastica</i>                      | Vladimír Hampel                                    | Natalia Ewa Janowicz<br>Anna M.G. Novák Vanclová                                                                                      | <a href="#">Link</a>                                                                                                 |                       |

|                             |                                        |                                                                                |                                                                      |
|-----------------------------|----------------------------------------|--------------------------------------------------------------------------------|----------------------------------------------------------------------|
| <i>Naegleria gruberi</i>    | Anastasios Tsaousis                    | Veronica Freire-Beneitez<br>Eleanna Kazana<br>Jan Pyrih<br>Tobias von der Haar | <a href="#">Link</a><br><a href="#">Link</a><br><a href="#">Link</a> |
| <b>Opisthokonts</b>         |                                        |                                                                                |                                                                      |
| <i>Pirum gemmata</i>        | Elena Casacuberta<br>Iñaki Ruiz-Trillo | Cristina Aresté                                                                | <a href="#">Link</a>                                                 |
| <i>Sphaeroforma arctica</i> | Elena Casacuberta<br>Iñaki Ruiz-Trillo | Cristina Aresté<br>Omayra Dudin                                                | <a href="#">Link</a><br><a href="#">Link</a>                         |
| <i>Abeoforma whisleri</i>   | Elena Casacuberta<br>Iñaki Ruiz-Trillo | Elena Casacuberta<br>Cristina Aresté<br>Sebastián Najle                        | <a href="#">Link</a><br><a href="#">Link</a>                         |
| <i>Salpingoeca rosetta</i>  | Nicole King                            | David Booth<br>Monika Sigg                                                     | <a href="#">Link</a>                                                 |

**Reference to Suppl. Table 5:**

Djouani-Tahri el B, Sanchez F, Lozano JC, Bouget FY (2011). A phosphate-regulated promoter for fine-tuned and reversible overexpression in *Ostreococcus*: application to circadian clock functional analysis. PLoS One **6**: e28471.
